# Supplementary material for: Cytokine response during non-cerebral and cerebral malaria: evidence of a failure to control inflammation as a cause of death in African adults
Source: PeerJ. 2016 May 2;4:e1965. doi: 10.7717/peerj.1965 (PMC4860323; doi:10.7717/peerj.1965)
Supplement: File S1 [file peerj-04-1965-s001.xlsx]

## Sheet: Correlations in CT
		Spearman correlation among biomarkers in control individuals. Significant correlations are shown in red.
Nonparametric Correlations
Notes
Output Created		05-Mar-2016 19:12:55
Comments
Input	Data	C:\Users\user\Desktop\YD FROM NOV-28\Hp and malaria\Malaria manuscripts\Writing cytokine paper\PeerJ submission\Revision PeerJ\Stats for revision\SPSS Cytokine Palu-March 2016.sav
	Active Dataset	DataSet1
	Filter	Status = 1 (FILTER)
	Weight	<none>
	Split File	<none>
	N of Rows in Working Data File	18
Missing Value Handling	Definition of Missing	User-defined missing values are treated as missing.
	Cases Used	Statistics for each pair of variables are based on all the cases with valid data for that pair.
Syntax		NONPAR CORR /VARIABLES=EGF Eotaxin GCSF GMCSF IFNa2 IFNg IL12p70 IL17A IL1RA IL7 IL8 IP10 MCP1 MIP1a MIP1b TNFa VEGF /PRINT=SPEARMAN TWOTAIL NOSIG /MISSING=PAIRWISE.
Resources	Processor Time	0:00:00.046
	Elapsed Time	0:00:00.046
	Number of Cases Allowed	40329 casesa
a. Based on availability of workspace memory
[DataSet1] C:\Users\user\Desktop\YD FROM NOV-28\Hp and malaria\Malaria manuscripts\Writing cytokine paper\PeerJ submission\Revision PeerJ\Stats for revision\SPSS Cytokine Palu-March 2016.sav
Correlations
			EGF	Eotaxin	G-CSF	GM-CSF	IFN-alpha2	IFN-gamma	IL-12p70	IL-17A	IL-1RA	IL-7	IL-8	IP-10	MCP-1	MIP-1alpha	MIP-1beta	TNFalpha	VEGF
Spearman's rho	EGF	Correlation Coefficient	1
		Sig. (2-tailed)	.
		N	18
	Eotaxin	Correlation Coefficient	0.356774	1
		Sig. (2-tailed)	0.146131	.
		N	18	18
	G-CSF	Correlation Coefficient	0.245215	0.2127	1
		Sig. (2-tailed)	0.326714	0.396781	.
		N	18	18	18
	GM-CSF	Correlation Coefficient	0.244941	-0.168826	0.326945	1
		Sig. (2-tailed)	0.327273	0.503064	0.185413	.
		N	18	18	18	18
	IFN-alpha2	Correlation Coefficient	0.33405	0.100321	-0.0135922	.562*	1
		Sig. (2-tailed)	0.175478	0.692051	0.95731	0.0152868	.
		N	18	18	18	18	18
	IFN-gamma	Correlation Coefficient	0.203948	0.31109	0.101816	0.404827	.486*	1
		Sig. (2-tailed)	0.416938	0.208915	0.687681	0.0956207	0.040673	.
		N	18	18	18	18	18	18
	IL-12p70	Correlation Coefficient	0.176561	0.176197	-0.04701	0.282939	.606**	.506*	1
		Sig. (2-tailed)	0.483399	0.484318	0.853049	0.255259	0.00774037	0.0320286	.
		N	18	18	18	18	18	18	18
	IL-17A	Correlation Coefficient	-0.0653763	0.292533	0.173189	0.251351	.562*	.635**	0.382186	1
		Sig. (2-tailed)	0.796615	0.238796	0.491925	0.314363	0.0153067	0.00459428	0.117541	.
		N	18	18	18	18	18	18	18	18
	IL-1RA	Correlation Coefficient	0.108505	-0.183245	0.00833362	.510*	.647**	0.38833	0.365222	0.274962	1
		Sig. (2-tailed)	0.668237	0.466719	0.973819	0.0304237	0.00371874	0.111272	0.136142	0.269474	.
		N	18	18	18	18	18	18	18	18	18
	IL-7	Correlation Coefficient	.469*	0.457268	0.36834	0.243035	.488*	0.281989	.589*	0.0676824	0.254229	1
		Sig. (2-tailed)	0.0494341	0.0564035	0.132579	0.33117	0.0399529	0.256926	0.0101281	0.78959	0.308668	.
		N	18	18	18	18	18	18	18	18	18	18
	IL-8	Correlation Coefficient	0.297102	0.278926	.593**	0.0570246	0.154299	0.223266	0.163551	0.396065	-0.0369996	0.366069	1
		Sig. (2-tailed)	0.2312	0.26235	0.00944972	0.822175	0.54099	0.373169	0.516685	0.103722	0.884114	0.135167	.
		N	18	18	18	18	18	18	18	18	18	18	18
	IP-10	Correlation Coefficient	-0.42089	0.102167	0.0320083	0.131539	0.0219453	0.0284726	0.0672751	0.424068	-0.0864167	-0.333117	-0.160124	1
		Sig. (2-tailed)	0.0819735	0.686655	0.899667	0.60287	0.931123	0.910705	0.79083	0.0794523	0.733139	0.176761	0.525628	.
		N	18	18	18	18	18	18	18	18	18	18	18	18
	MCP-1	Correlation Coefficient	-0.120993	-0.306502	0.19205	-0.0372866	-0.36262	-0.362763	-.672**	-0.204142	0.0135351	-.589*	-0.211777	0.0257998	1
		Sig. (2-tailed)	0.632479	0.216064	0.445194	0.883221	0.139167	0.139	0.00226806	0.416486	0.95749	0.0101461	0.398882	0.91906	.
		N	18	18	18	18	18	18	18	18	18	18	18	18	18
	MIP-1alpha	Correlation Coefficient	0.465605	0.20282	0.148197	0.325074	0.197289	.515*	0.136097	-0.0507618	0.0582866	.489*	0.338999	-.622**	-0.310991	1
		Sig. (2-tailed)	0.0515011	0.419574	0.557295	0.188089	0.432632	0.028739	0.590249	0.841457	0.818301	0.0394465	0.168774	0.00585005	0.209067	.
		N	18	18	18	18	18	18	18	18	18	18	18	18	18	18
	MIP-1beta	Correlation Coefficient	0.401657	0.0692149	-0.298191	-0.00622086	0.151161	0.00844506	0.0192413	-0.21594	0.0901539	0.272552	-0.0506722	-.781**	-0.121901	.519*	1
		Sig. (2-tailed)	0.0984976	0.784931	0.229411	0.980455	0.549349	0.973469	0.939594	0.389457	0.722023	0.273863	0.841733	0.000130334	0.629908	0.0272182	.
		N	18	18	18	18	18	18	18	18	18	18	18	18	18	18	18
	TNFalpha	Correlation Coefficient	0.346791	0.46281	.633**	0.173147	-0.0596274	0.0100285	0.137896	0.0858492	-0.266293	0.398062	.500*	0.224174	-0.0454546	0.140891	-0.274043	1
		Sig. (2-tailed)	0.158573	0.0531073	0.00484586	0.492031	0.81419	0.968497	0.585299	0.734832	0.285469	0.101834	0.0345997	0.371179	0.857864	0.577098	0.271142	.
		N	18	18	18	18	18	18	18	18	18	18	18	18	18	18	18	18
	VEGF	Correlation Coefficient	0.194467	0.115813	-0.133619	0.450274	.485*	.645**	0.225641	0.31065	.522*	0.141053	0.104966	-0.309878	-0.103293	.537*	0.467386	-0.278865	1
		Sig. (2-tailed)	0.439376	0.647223	0.597097	0.0607794	0.0411175	0.00384711	0.367973	0.209594	0.026421	0.576655	0.6785	0.210788	0.683372	0.0214223	0.050497	0.262459	.
		N	18	18	18	18	18	18	18	18	18	18	18	18	18	18	18	18	18
*. Correlation is significant at the 0.05 level (2-tailed).
**. Correlation is significant at the 0.01 level (2-tailed).

## Sheet: Correlations in NCM
Spearman correlation among biomarkers and between parasitemia and biomarkers in non-cerebral malaria patients. Significant correlations are shown in red.
Nonparametric Correlations
Notes
Output Created		05-Mar-2016 20:07:23
Comments
Input	Data	C:\Users\user\Desktop\YD FROM NOV-28\Hp and malaria\Malaria manuscripts\Writing cytokine paper\PeerJ submission\Revision PeerJ\Stats for revision\SPSS Cytokine Palu-March 2016.sav
	Active Dataset	DataSet1
	Filter	Status = 2 (FILTER)
	Weight	<none>
	Split File	<none>
	N of Rows in Working Data File	17
Missing Value Handling	Definition of Missing	User-defined missing values are treated as missing.
	Cases Used	Statistics for each pair of variables are based on all the cases with valid data for that pair.
Syntax		NONPAR CORR /VARIABLES=EGF Eotaxin GCSF GMCSF IFNa2 IFNg IL10 IL12p70 IL15 IL17A IL1RA IL1a IL1b IL5 IL6 IL7 IL8 IP10 MCP1 MIP1a MIP1b TNFa VEGF Parasitemia /PRINT=SPEARMAN TWOTAIL NOSIG /MISSING=PAIRWISE.
Resources	Processor Time	0:00:00.094
	Elapsed Time	0:00:00.097
	Number of Cases Allowed	29676 casesa
a. Based on availability of workspace memory
[DataSet1] C:\Users\user\Desktop\YD FROM NOV-28\Hp and malaria\Malaria manuscripts\Writing cytokine paper\PeerJ submission\Revision PeerJ\Stats for revision\SPSS Cytokine Palu-March 2016.sav
Correlations
			EGF	Eotaxin	G-CSF	GM-CSF	IFN-alpha2	IFN-gamma	IL-10	IL-12p70	IL-15	IL-17A	IL-1RA	IL-1alpha	IL-1beta	IL-5	IL-6	IL-7	IL-8	IP-10	MCP-1	MIP-1alpha	MIP-1beta	TNFalpha	VEGF	Parasitemia
Spearman's rho	EGF	Correlation Coefficient	1
		Sig. (2-tailed)	.
		N	17
	Eotaxin	Correlation Coefficient	-0.0834356	1
		Sig. (2-tailed)	0.750207	.
		N	17	17
	G-CSF	Correlation Coefficient	0.363413	-0.256285	1
		Sig. (2-tailed)	0.15162	0.320752	.
		N	17	17	17
	GM-CSF	Correlation Coefficient	0.293252	-0.0220588	.699**	1
		Sig. (2-tailed)	0.253309	0.93303	0.0017967	.
		N	17	17	17	17
	IFN-alpha2	Correlation Coefficient	-0.0171885	.504*	0.337423	.747**	1
		Sig. (2-tailed)	0.947795	0.0391341	0.185334	0.000572762	.
		N	17	17	17	17	17
	IFN-gamma	Correlation Coefficient	0.371622	0.392638	.501*	.736**	.807**	1
		Sig. (2-tailed)	0.141906	0.119006	0.0405393	0.00075275	8.95418e-05	.
		N	17	17	17	17	17	17
	IL-10	Correlation Coefficient	0.0564418	-0.352941	.601*	0.426471	0.223176	0.292025	1
		Sig. (2-tailed)	0.829643	0.164658	0.0107469	0.0878046	0.389225	0.255392	.
		N	17	17	17	17	17	17	17
	IL-12p70	Correlation Coefficient	0.18904	0.478478	0.424617	.560*	.589*	.666**	-0.0750313	1
		Sig. (2-tailed)	0.467438	0.0520268	0.0893417	0.0194867	0.0128687	0.00349725	0.774724	.
		N	17	17	17	17	17	17	17	17
	IL-15	Correlation Coefficient	0.1116	0.207002	.571*	.735**	.749**	.840**	0.337042	.505*	1
		Sig. (2-tailed)	0.669798	0.425351	0.0166804	0.000773368	0.00054213	2.48805e-05	0.185863	0.0387811	.
		N	17	17	17	17	17	17	17	17	17
	IL-17A	Correlation Coefficient	-0.0518525	0.12454	0.167183	.624**	.563*	0.47408	0.161532	0.417699	0.261688	1
		Sig. (2-tailed)	0.843326	0.633903	0.521296	0.00743481	0.0187153	0.0545374	0.535671	0.0952515	0.310294	.
		N	17	17	17	17	17	17	17	17	17	17
	IL-1RA	Correlation Coefficient	0.395078	0.0688387	.750**	.792**	.581*	.689**	.493*	.532*	.594*	0.371678	1
		Sig. (2-tailed)	0.116528	0.79292	0.000521379	0.000152885	0.014414	0.00223777	0.0443815	0.0278044	0.0119949	0.141841	.
		N	17	17	17	17	17	17	17	17	17	17	17
	IL-1alpha	Correlation Coefficient	0.435461	0.230727	.542*	.770**	.705**	.739**	0.156697	.700**	.633**	0.315953	.734**	1
		Sig. (2-tailed)	0.0806176	0.372951	0.0246135	0.000300502	0.00157559	0.000705745	0.548109	0.00176825	0.00635563	0.21667	0.000797104	.
		N	17	17	17	17	17	17	17	17	17	17	17	17
	IL-1beta	Correlation Coefficient	0.305887	0.192232	0.366839	0.42703	0.19235	0.285265	-0.0370734	.495*	0.108533	0.342632	.511*	0.407128	1
		Sig. (2-tailed)	0.232468	0.459811	0.147512	0.0873441	0.45953	0.267063	0.887663	0.0434794	0.678408	0.178212	0.036064	0.104816	.
		N	17	17	17	17	17	17	17	17	17	17	17	17	17
	IL-5	Correlation Coefficient	0.0453327	0.448655	-0.0199067	-0.0562533	0.180533	0.138745	-0.465119	0.0867576	0.161932	-0.227785	0.152764	0.108438	0.315142	1
		Sig. (2-tailed)	0.862838	0.0708581	0.939552	0.830203	0.488065	0.595371	0.0599309	0.740577	0.534649	0.379245	0.558319	0.678676	0.217916	.
		N	17	17	17	17	17	17	17	17	17	17	17	17	17	17
	IL-6	Correlation Coefficient	0.275629	-0.454936	.844**	.490*	0.165031	0.334561	.618**	0.0566157	.513*	0.0277611	.513*	0.230251	0.0158002	-0.0912961	1
		Sig. (2-tailed)	0.284258	0.0665298	2.03598e-05	0.0456071	0.526751	0.189327	0.00819176	0.829125	0.0354187	0.915771	0.0352492	0.373965	0.952007	0.727479	.
		N	17	17	17	17	17	17	17	17	17	17	17	17	17	17	17
	IL-7	Correlation Coefficient	0.26983	.516*	0.339673	.735**	.845**	.828**	0.081627	.612**	.697**	0.468021	.745**	.835**	0.405029	0.332188	0.105662	1
		Sig. (2-tailed)	0.294923	0.0341108	0.182235	0.00078273	1.93526e-05	4.01379e-05	0.755465	0.00904563	0.00186404	0.0581426	0.000594734	3.05616e-05	0.106793	0.192681	0.686504	.
		N	17	17	17	17	17	17	17	17	17	17	17	17	17	17	17	17
	IL-8	Correlation Coefficient	0.415592	-0.360515	.637**	.712**	0.304908	0.407612	.619**	0.249847	0.257584	.547*	.744**	0.401242	0.372335	-0.315075	.574*	0.342266	1
		Sig. (2-tailed)	0.0971057	0.155155	0.00591515	0.00133106	0.234043	0.104363	0.00802977	0.333475	0.318219	0.023189	0.000613602	0.110427	0.141082	0.21802	0.016061	0.178706	.
		N	17	17	17	17	17	17	17	17	17	17	17	17	17	17	17	17	17
	IP-10	Correlation Coefficient	0.130061	-0.237745	.741**	.711**	.498*	.486*	.544*	0.373926	.674**	0.204689	0.405656	.547*	0.063162	-0.303219	.643**	0.269499	0.391171	1
		Sig. (2-tailed)	0.618813	0.358171	0.000672036	0.00138239	0.0419835	0.0479929	0.023945	0.139257	0.00300372	0.430655	0.106199	0.0231877	0.809689	0.236774	0.00540787	0.295539	0.120515	.
		N	17	17	17	17	17	17	17	17	17	17	17	17	17	17	17	17	17	17
	MCP-1	Correlation Coefficient	.483*	-0.25	.609**	0.443627	0.117719	0.208589	.532*	0.0811814	0.156579	0.139337	.626**	0.271444	0.291095	-0.124855	.656**	0.217672	.784**	0.252451	1
		Sig. (2-tailed)	0.0493015	0.33317	0.00940028	0.0744685	0.652733	0.421731	0.0279876	0.756762	0.548415	0.593788	0.0072203	0.291931	0.256979	0.633039	0.0042389	0.401326	0.000198262	0.328294	.
		N	17	17	17	17	17	17	17	17	17	17	17	17	17	17	17	17	17	17	17
	MIP-1alpha	Correlation Coefficient	.512*	-0.0701483	0.455617	0.363268	0.167331	.531*	.566*	0.209966	0.231935	0.360473	.563*	0.298269	0.233686	-0.192835	0.40172	0.315865	.638**	0.096454	.540*	1
		Sig. (2-tailed)	0.0354927	0.789063	0.0660722	0.151795	0.520923	0.0284603	0.0178177	0.418603	0.370384	0.155207	0.0186412	0.244899	0.36668	0.458377	0.109963	0.216805	0.00585733	0.712681	0.0252842	.
		N	17	17	17	17	17	17	17	17	17	17	17	17	17	17	17	17	17	17	17	17
	MIP-1beta	Correlation Coefficient	0.407612	-0.0318823	.516*	0.313918	0.0662577	0.171271	0.396076	0.129847	0.0716985	0.167183	.572*	0.167904	0.434162	0.05972	.485*	0.210027	.629**	0.0392397	.912**	.572*	1
		Sig. (2-tailed)	0.104363	0.903318	0.0339988	0.219806	0.800534	0.511012	0.115524	0.619398	0.784504	0.521296	0.016442	0.519475	0.0816287	0.819896	0.0486441	0.418465	0.00685023	0.881141	3.34822e-07	0.0163894	.
		N	17	17	17	17	17	17	17	17	17	17	17	17	17	17	17	17	17	17	17	17	17
	TNFalpha	Correlation Coefficient	0.106749	-0.458333	.755**	.507*	0.148375	0.165644	.855**	0.0455108	0.281311	0.14057	.535*	0.167802	0.208709	-0.310079	.712**	0	.706**	.603*	.691**	0.440932	.589*	1
		Sig. (2-tailed)	0.683436	0.0642713	0.000454486	0.0376329	0.569811	0.525193	1.20294e-05	0.862304	0.274041	0.590493	0.0269981	0.519735	0.421457	0.225802	0.00133106	1	0.00152854	0.0104069	0.00212112	0.0764584	0.0129317	.
		N	17	17	17	17	17	17	17	17	17	17	17	17	17	17	17	17	17	17	17	17	17	17
	VEGF	Correlation Coefficient	0.316503	0.346866	0.324309	0.478478	.530*	.581*	0.254614	.591*	0.255714	0.369432	.774**	.666**	.491*	0.078495	0.060308	.697**	.569*	0.0479708	0.447728	.516*	0.425233	0.195573	1
		Sig. (2-tailed)	0.215826	0.172558	0.204094	0.0520268	0.0284805	0.0143931	0.324025	0.0125262	0.321868	0.144454	0.000264413	0.00353903	0.0451926	0.764594	0.81815	0.00187239	0.0170818	0.854933	0.0715141	0.0339328	0.0888292	0.451896	.
		N	17	17	17	17	17	17	17	17	17	17	17	17	17	17	17	17	17	17	17	17	17	17	17
	Parasitemia	Correlation Coefficient	-0.1283	0.109136	0.430675	.511*	.569*	0.387968	0.429185	-0.0246155	0.471352	0.285014	.493*	0.325932	0.251429	0.321253	0.333742	.507*	0.233129	0.370325	0.167995	0.0864858	0.169325	0.343348	0.201847	1
		Sig. (2-tailed)	0.623613	0.676714	0.0843882	0.0359115	0.0170599	0.123854	0.085588	0.925288	0.0561396	0.267504	0.0442312	0.201708	0.330322	0.208637	0.19048	0.0378249	0.367856	0.143411	0.519246	0.741364	0.515896	0.177248	0.437221	.
		N	17	17	17	17	17	17	17	17	17	17	17	17	17	17	17	17	17	17	17	17	17	17	17	17
*. Correlation is significant at the 0.05 level (2-tailed).
**. Correlation is significant at the 0.01 level (2-tailed).

## Sheet: Correlations in CM
Spearman correlation among biomarkers and between parasitemia and biomarkers in cerebral malaria patients. Significant correlations are shown in red.
Nonparametric Correlations
Notes
Output Created		05-Mar-2016 20:10:58
Comments
Input	Data	C:\Users\user\Desktop\YD FROM NOV-28\Hp and malaria\Malaria manuscripts\Writing cytokine paper\PeerJ submission\Revision PeerJ\Stats for revision\SPSS Cytokine Palu-March 2016.sav
	Active Dataset	DataSet1
	Filter	Status = 3 (FILTER)
	Weight	<none>
	Split File	<none>
	N of Rows in Working Data File	27
Missing Value Handling	Definition of Missing	User-defined missing values are treated as missing.
	Cases Used	Statistics for each pair of variables are based on all the cases with valid data for that pair.
Syntax		NONPAR CORR /VARIABLES=EGF Eotaxin GCSF GMCSF IFNa2 IFNg IL10 IL12p70 IL15 IL17A IL1RA IL1a IL1b IL6 IL7 IL8 IP10 MCP1 MIP1a MIP1b TNFa VEGF Parasitemia /PRINT=SPEARMAN TWOTAIL NOSIG /MISSING=PAIRWISE.
Resources	Processor Time	0:00:00.094
	Elapsed Time	0:00:00.092
	Number of Cases Allowed	30840 casesa
a. Based on availability of workspace memory
[DataSet1] C:\Users\user\Desktop\YD FROM NOV-28\Hp and malaria\Malaria manuscripts\Writing cytokine paper\PeerJ submission\Revision PeerJ\Stats for revision\SPSS Cytokine Palu-March 2016.sav
Correlations
			EGF	Eotaxin	G-CSF	GM-CSF	IFN-alpha2	IFN-gamma	IL-10	IL-12p70	IL-15	IL-17A	IL-1RA	IL-1alpha	IL-1beta	IL-6	IL-7	IL-8	IP-10	MCP-1	MIP-1alpha	MIP-1beta	TNFalpha	VEGF	Parasitemia
Spearman's rho	EGF	Correlation Coefficient	1
		Sig. (2-tailed)	.
		N	27
	Eotaxin	Correlation Coefficient	-0.149733	1
		Sig. (2-tailed)	0.456008	.
		N	27	27
	G-CSF	Correlation Coefficient	-0.106051	.543**	1
		Sig. (2-tailed)	0.59856	0.00339509	.
		N	27	27	27
	GM-CSF	Correlation Coefficient	0.0256881	.595**	.658**	1
		Sig. (2-tailed)	0.898795	0.00105971	0.000190528	.
		N	27	27	27	27
	IFN-alpha2	Correlation Coefficient	-0.0218956	.433*	.656**	.830**	1
		Sig. (2-tailed)	0.913677	0.0241212	0.000205207	8.80097e-08	.
		N	27	27	27	27	27
	IFN-gamma	Correlation Coefficient	0.0479106	.556**	.453*	.803**	.698**	1
		Sig. (2-tailed)	0.812419	0.00258612	0.0177014	4.74421e-07	5.14586e-05	.
		N	27	27	27	27	27	27
	IL-10	Correlation Coefficient	-0.167329	.553**	.677**	.695**	.474*	.512**	1
		Sig. (2-tailed)	0.404151	0.00279914	0.000106515	5.69646e-05	0.0125167	0.00638559	.
		N	27	27	27	27	27	27	27
	IL-12p70	Correlation Coefficient	-0.00322683	0.315585	.473*	.667**	.868**	.555**	0.298132	1
		Sig. (2-tailed)	0.987255	0.108821	0.0126493	0.00014565	4.37984e-09	0.00267684	0.130935	.
		N	27	27	27	27	27	27	27	27
	IL-15	Correlation Coefficient	-0.109606	.514**	.558**	.578**	.471*	.404*	.401*	.428*	1
		Sig. (2-tailed)	0.586286	0.00607651	0.0024852	0.00157717	0.0131475	0.0364568	0.0380918	0.0260835	.
		N	27	27	27	27	27	27	27	27	27
	IL-17A	Correlation Coefficient	0.0425662	0.244418	.385*	.400*	.475*	.458*	0.288053	.551**	.414*	1
		Sig. (2-tailed)	0.833036	0.219193	0.0470512	0.0388832	0.0122861	0.0162451	0.145107	0.00291476	0.0317575	.
		N	27	27	27	27	27	27	27	27	27	27
	IL-1RA	Correlation Coefficient	0.0200245	.543**	.548**	.732**	.691**	.728**	.578**	.448*	.423*	0.292732	1
		Sig. (2-tailed)	0.92103	0.00344837	0.00309832	1.42065e-05	6.58412e-05	1.6971e-05	0.00158369	0.0191212	0.0277716	0.138397	.
		N	27	27	27	27	27	27	27	27	27	27	27
	IL-1alpha	Correlation Coefficient	-0.091788	.471*	.504**	.903**	.672**	.754**	.671**	.494**	.466*	0.247613	.596**	1
		Sig. (2-tailed)	0.648865	0.0132222	0.00737543	1.1591e-10	0.000122363	5.48689e-06	0.00012706	0.00874265	0.0142405	0.213038	0.00104736	.
		N	27	27	27	27	27	27	27	27	27	27	27	27
	IL-1beta	Correlation Coefficient	0.189347	0.166797	.382*	.480*	.645**	.429*	0.213792	.602**	0.248513	0.347617	.551**	0.320401	1
		Sig. (2-tailed)	0.344191	0.405668	0.0493212	0.0112762	0.000280252	0.0253885	0.284272	0.000890947	0.211326	0.0756208	0.00291507	0.103237	.
		N	27	27	27	27	27	27	27	27	27	27	27	27	27
	IL-6	Correlation Coefficient	-0.182429	.566**	.686**	.496**	.508**	0.355352	.528**	0.301156	.623**	0.192108	.656**	0.368306	0.295377	1
		Sig. (2-tailed)	0.362426	0.00209198	7.81626e-05	0.00849247	0.00681193	0.0689141	0.00465705	0.126886	0.000522463	0.33707	0.00020509	0.0587209	0.134705	.
		N	27	27	27	27	27	27	27	27	27	27	27	27	27	27
	IL-7	Correlation Coefficient	0.374723	0.102017	.429*	0.3322	.553**	0.368406	0.00235459	.524**	0.225181	0.317401	0.327545	0.126564	.516**	0.13372	1
		Sig. (2-tailed)	0.0541271	0.612622	0.0254936	0.0904658	0.00276439	0.0586469	0.9907	0.00503699	0.258776	0.106689	0.0953539	0.529306	0.00591618	0.506084	.
		N	27	27	27	27	27	27	27	27	27	27	27	27	27	27	27
	IL-8	Correlation Coefficient	-0.0644767	0.241758	.551**	0.359554	.535**	0.140673	0.378873	0.318654	.488**	0.256042	.431*	0.190492	.475*	.592**	0.268696	1
		Sig. (2-tailed)	0.74934	0.224407	0.00287301	0.0654685	0.00400886	0.484013	0.0513092	0.105237	0.0097539	0.197365	0.0248381	0.341227	0.0122624	0.00115398	0.175355	.
		N	27	27	27	27	27	27	27	27	27	27	27	27	27	27	27	27
	IP-10	Correlation Coefficient	-0.231016	.454*	.499**	.814**	.591**	.643**	.751**	.392*	.390*	0.15387	.475*	.909**	0.289547	.395*	0.0470846	0.24359	1
		Sig. (2-tailed)	0.246309	0.0173127	0.00807959	2.43857e-07	0.00116129	0.000299233	6.45851e-06	0.0429569	0.0442884	0.44351	0.012314	5.31165e-11	0.14294	0.0414404	0.815598	0.220808	.
		N	27	27	27	27	27	27	27	27	27	27	27	27	27	27	27	27	27
	MCP-1	Correlation Coefficient	-0.179068	.677**	.679**	.759**	.621**	.527**	.773**	.436*	.558**	0.119609	.583**	.640**	0.148012	.663**	0.0838105	.523**	.688**	1
		Sig. (2-tailed)	0.371487	0.000105126	9.7707e-05	4.48559e-06	0.000551691	0.00471649	2.25208e-06	0.0230267	0.00250668	0.552354	0.00142619	0.000325964	0.461259	0.000164041	0.67769	0.00510448	7.29758e-05	.
		N	27	27	27	27	27	27	27	27	27	27	27	27	27	27	27	27	27	27
	MIP-1alpha	Correlation Coefficient	0.220279	0.212985	0.225909	.457*	0.357068	.505**	.421*	0.293673	0.24799	0.16208	.383*	.483*	0.19863	0.129816	0.139332	0.240298	.387*	.408*	1
		Sig. (2-tailed)	0.269563	0.286138	0.2572	0.0164299	0.0674908	0.0071971	0.0287017	0.137075	0.21232	0.419262	0.0483139	0.0106838	0.320606	0.51869	0.488232	0.227305	0.0461302	0.0348489	.
		N	27	27	27	27	27	27	27	27	27	27	27	27	27	27	27	27	27	27	27
	MIP-1beta	Correlation Coefficient	-0.055615	0.315018	.434*	.532**	.427*	0.347095	.571**	0.357642	.412*	0.0957482	.453*	.611**	.412*	.457*	0.00156949	0.318071	.592**	.457*	.640**	1
		Sig. (2-tailed)	0.782915	0.109491	0.0236607	0.00432736	0.0261907	0.0760904	0.0018582	0.0670195	0.0325199	0.634734	0.0175954	0.000709704	0.0328924	0.0164838	0.993801	0.105911	0.00115398	0.0164838	0.000325453	.
		N	27	27	27	27	27	27	27	27	27	27	27	27	27	27	27	27	27	27	27	27
	TNFalpha	Correlation Coefficient	-0.202598	.565**	.651**	.762**	.557**	.463*	.867**	.415*	.616**	0.200979	.607**	.723**	0.272381	.567**	0.00439456	.501**	.748**	.817**	.491**	.716**	1
		Sig. (2-tailed)	0.310834	0.00212059	0.000234364	3.83984e-06	0.0025259	0.015091	5.04581e-09	0.0313354	0.00062118	0.314797	0.000778998	2.01854e-05	0.169281	0.00203574	0.982644	0.00773799	7.32293e-06	1.94432e-07	0.00935178	2.6639e-05	.
		N	27	27	27	27	27	27	27	27	27	27	27	27	27	27	27	27	27	27	27	27	27
	VEGF	Correlation Coefficient	0.132353	0.108646	0.171565	.440*	.509**	.669**	-0.0250996	.520**	0.0843578	0.3524	.513**	0.345081	.456*	0.0645756	.466*	-0.0884471	0.136496	0.0713086	0.0960004	-0.0581486	-0.040704	1
		Sig. (2-tailed)	0.510481	0.58959	0.392184	0.0215951	0.00674133	0.000136623	0.901102	0.00539914	0.675697	0.0714174	0.00617471	0.0779246	0.0168039	0.748967	0.0142317	0.660879	0.497212	0.723753	0.633838	0.773274	0.840245	.
		N	27	27	27	27	27	27	27	27	27	27	27	27	27	27	27	27	27	27	27	27	27	27
	Parasitemia	Correlation Coefficient	0.0348411	0.0601435	0.158779	0.206233	0.168579	0.130295	0.0477863	0.0417569	0.199413	-0.18663	0.122633	0.194233	0.188526	-0.0522058	0.209872	0.270798	0.178904	0.184094	.392*	0.206686	0.27263	-0.0235691	1
		Sig. (2-tailed)	0.863025	0.765706	0.428923	0.302045	0.400598	0.517135	0.812897	0.836168	0.318663	0.351286	0.542277	0.331651	0.346327	0.795937	0.293404	0.171872	0.371933	0.357987	0.04317	0.300961	0.168877	0.907106	.
		N	27	27	27	27	27	27	27	27	27	27	27	27	27	27	27	27	27	27	27	27	27	27	27
**. Correlation is significant at the 0.01 level (2-tailed).
*. Correlation is significant at the 0.05 level (2-tailed).
