# Supplementary material for: Cytokine response during non-cerebral and cerebral malaria: evidence of a failure to control inflammation as a cause of death in African adults
Source: PeerJ journal article supplement (doi:10.7717/peerj.1965), 2016-05-02
Supplement: Mann-Whitney_Kidney-Biomarker.pdf [file Mann-Whitney_Kidney-Biomarker.pdf]

NPART TESTS

```

/M-W= EGF Eotaxin GCSF GMCSF IFNa2 IFNg IL10 IL12p40 IL12p70 IL13 IL15 IL17
A IL1RA IL1a IL1b IL2 IL3 IL4 IL5 IL6 IL7 IL8 IP10 MCP1
MIP1a MIP1b TNFa TNFb VEGF BY Kidney(0 1)
/MISSING ANALYSIS.

```

**NPar Tests**

**Notes**

|                        |                                      |                                                                                                                                                                                                                   |
|------------------------|--------------------------------------|-------------------------------------------------------------------------------------------------------------------------------------------------------------------------------------------------------------------|
|                        | Output Created                       | 01-Mar-2016 19:12:16                                                                                                                                                                                              |
| Input                  | Comments                             |                                                                                                                                                                                                                   |
|                        | Data                                 | C:\Users\user\Desktop\YD FROM NOV-28\Hp and malaria\Cytokines IPDK\Stats Cytokine\NCM + CM.sav                                                                                                                    |
|                        | Active Dataset                       | DataSet2                                                                                                                                                                                                          |
|                        | Filter                               | Status = 3 (FILTER)                                                                                                                                                                                               |
|                        | Weight                               | <none>                                                                                                                                                                                                            |
|                        | Split File                           | <none>                                                                                                                                                                                                            |
|                        | N of Rows in Working Data File       | 27                                                                                                                                                                                                                |
| Missing Value Handling | Definition of Missing                | User-defined missing values are treated as missing.                                                                                                                                                               |
|                        | Cases Used                           | Statistics for each test are based on all cases with valid data for the variable(s) used in that test.                                                                                                            |
|                        | Syntax                               | NPART TESTS<br>/M-W= EGF Eotaxin GCSF GMCSF IFNa2 IFNg IL10 IL12p40 IL12p70 IL13 IL15 IL17A IL1RA IL1a IL1b IL2 IL3 IL4 IL5 IL6 IL7 IL8 IP10 MCP1 MIP1a MIP1b TNFa TNFb VEGF BY Kidney(0 1)<br>/MISSING ANALYSIS. |
| Resources              | Processor Time                       | 0:00:00.031                                                                                                                                                                                                       |
|                        | Elapsed Time                         | 0:00:00.032                                                                                                                                                                                                       |
|                        | Number of Cases Allowed <sup>a</sup> | 22469                                                                                                                                                                                                             |

a. Based on availability of workspace memory.

```

[DataSet2] C:\Users\user\Desktop\YD FROM NOV-28\Hp and malaria\Cytokines IPDK
\Stats Cytokine\NCM + CM.sav

```

**Mann-Whitney Test**

**Ranks**

| <b>Kidney failure</b> |       | <b>N</b> | <b>Mean Rank</b> | <b>Sum of Ranks</b> |
|-----------------------|-------|----------|------------------|---------------------|
| EGF                   | No    | 14       | 14.54            | 203.50              |
|                       | Yes   | 13       | 13.42            | 174.50              |
|                       | Total | 27       |                  |                     |
| Eotaxin               | No    | 14       | 10.14            | 142.00              |
|                       | Yes   | 13       | 18.15            | 236.00              |
|                       | Total | 27       |                  |                     |
| G-CSF                 | No    | 14       | 10.25            | 143.50              |
|                       | Yes   | 13       | 18.04            | 234.50              |
|                       | Total | 27       |                  |                     |
| GM-CSF                | No    | 14       | 8.64             | 121.00              |
|                       | Yes   | 13       | 19.77            | 257.00              |
|                       | Total | 27       |                  |                     |
| IFN-alpha2            | No    | 14       | 10.07            | 141.00              |
|                       | Yes   | 13       | 18.23            | 237.00              |
|                       | Total | 27       |                  |                     |
| IFN-gamma             | No    | 14       | 10.04            | 140.50              |
|                       | Yes   | 13       | 18.27            | 237.50              |
|                       | Total | 27       |                  |                     |
| IL-10                 | No    | 14       | 10.57            | 148.00              |
|                       | Yes   | 13       | 17.69            | 230.00              |
|                       | Total | 27       |                  |                     |
| IL-12p40              | No    | 14       | 13.39            | 187.50              |
|                       | Yes   | 13       | 14.65            | 190.50              |
|                       | Total | 27       |                  |                     |
| IL-12p70              | No    | 14       | 10.68            | 149.50              |
|                       | Yes   | 13       | 17.58            | 228.50              |
|                       | Total | 27       |                  |                     |
| IL-13                 | No    | 14       | 13.50            | 189.00              |
|                       | Yes   | 13       | 14.54            | 189.00              |
|                       | Total | 27       |                  |                     |
| IL-15                 | No    | 14       | 9.43             | 132.00              |
|                       | Yes   | 13       | 18.92            | 246.00              |
|                       | Total | 27       |                  |                     |
| IL-17A                | No    | 14       | 11.00            | 154.00              |
|                       | Yes   | 13       | 17.23            | 224.00              |
|                       | Total | 27       |                  |                     |
| IL-1RA                | No    | 14       | 11.07            | 155.00              |
|                       | Yes   | 13       | 17.15            | 223.00              |

**Ranks**

| <b>Kidney failure</b> |       | <b>N</b> | <b>Mean Rank</b> | <b>Sum of Ranks</b> |
|-----------------------|-------|----------|------------------|---------------------|
| IL-1RA                | Total | 27       |                  |                     |
| IL-1alpha             | No    | 14       | 9.61             | 134.50              |
|                       | Yes   | 13       | 18.73            | 243.50              |
|                       | Total | 27       |                  |                     |
| IL-1beta              | No    | 14       | 11.86            | 166.00              |
|                       | Yes   | 13       | 16.31            | 212.00              |
|                       | Total | 27       |                  |                     |
| IL-2                  | No    | 14       | 12.39            | 173.50              |
|                       | Yes   | 13       | 15.73            | 204.50              |
|                       | Total | 27       |                  |                     |
| IL-3                  | No    | 14       | 13.50            | 189.00              |
|                       | Yes   | 13       | 14.54            | 189.00              |
|                       | Total | 27       |                  |                     |
| IL-4                  | No    | 14       | 13.93            | 195.00              |
|                       | Yes   | 13       | 14.08            | 183.00              |
|                       | Total | 27       |                  |                     |
| IL-5                  | No    | 14       | 13.50            | 189.00              |
|                       | Yes   | 13       | 14.54            | 189.00              |
|                       | Total | 27       |                  |                     |
| IL-6                  | No    | 14       | 11.21            | 157.00              |
|                       | Yes   | 13       | 17.00            | 221.00              |
|                       | Total | 27       |                  |                     |
| IL-7                  | No    | 14       | 13.36            | 187.00              |
|                       | Yes   | 13       | 14.69            | 191.00              |
|                       | Total | 27       |                  |                     |
| IL-8                  | No    | 14       | 12.00            | 168.00              |
|                       | Yes   | 13       | 16.15            | 210.00              |
|                       | Total | 27       |                  |                     |
| IP-10                 | No    | 14       | 10.00            | 140.00              |
|                       | Yes   | 13       | 18.31            | 238.00              |
|                       | Total | 27       |                  |                     |
| MCP-1                 | No    | 14       | 9.64             | 135.00              |
|                       | Yes   | 13       | 18.69            | 243.00              |
|                       | Total | 27       |                  |                     |
| MIP-1alpha            | No    | 14       | 12.21            | 171.00              |
|                       | Yes   | 13       | 15.92            | 207.00              |
|                       | Total | 27       |                  |                     |
| MIP-1beta             | No    | 14       | 12.50            | 175.00              |
|                       | Yes   | 13       | 15.62            | 203.00              |
|                       | Total | 27       |                  |                     |

**Ranks**

| Kidney failure |       | N  | Mean Rank | Sum of Ranks |
|----------------|-------|----|-----------|--------------|
| TNFalpha       | No    | 14 | 9.93      | 139.00       |
|                | Yes   | 13 | 18.38     | 239.00       |
|                | Total | 27 |           |              |
| TNFbeta        | No    | 14 | 13.50     | 189.00       |
|                | Yes   | 13 | 14.54     | 189.00       |
|                | Total | 27 |           |              |
| VEGF           | No    | 14 | 11.96     | 167.50       |
|                | Yes   | 13 | 16.19     | 210.50       |
|                | Total | 27 |           |              |

**Test Statistics<sup>b</sup>**

|                                | EGF               | Eotaxin           | G-CSF             | GM-CSF            | IFN-alpha2        | IFN-gamma         |
|--------------------------------|-------------------|-------------------|-------------------|-------------------|-------------------|-------------------|
| Mann-Whitney U                 | 83.500            | 37.000            | 38.500            | 16.000            | 36.000            | 35.500            |
| Wilcoxon W                     | 174.500           | 142.000           | 143.500           | 121.000           | 141.000           | 140.500           |
| Z                              | -.364             | -2.620            | -2.548            | -3.642            | -2.675            | -2.698            |
| Asymp. Sig. (2-tailed)         | .716              | .009 <sup>a</sup> | .011              | .000              | .007              | .007              |
| Exact Sig. [2*(1-tailed Sig.)] | .720 <sup>a</sup> | .008 <sup>a</sup> | .009 <sup>a</sup> | .000 <sup>a</sup> | .007 <sup>a</sup> | .006 <sup>a</sup> |

a. Not corrected for ties.

b. Grouping Variable: Kidney failure

**Test Statistics<sup>b</sup>**

|                                | IL-10             | IL-12p40          | IL-12p70          | IL-13             | IL-15             | IL-17A            |
|--------------------------------|-------------------|-------------------|-------------------|-------------------|-------------------|-------------------|
| Mann-Whitney U                 | 43.000            | 82.500            | 44.500            | 84.000            | 27.000            | 49.000            |
| Wilcoxon W                     | 148.000           | 187.500           | 149.500           | 189.000           | 132.000           | 154.000           |
| Z                              | -2.330            | -.756             | -2.269            | -1.038            | -3.165            | -2.042            |
| Asymp. Sig. (2-tailed)         | .020              | .450              | .023              | .299              | .002              | .041              |
| Exact Sig. [2*(1-tailed Sig.)] | .019 <sup>a</sup> | .685 <sup>a</sup> | .022 <sup>a</sup> | .756 <sup>a</sup> | .001 <sup>a</sup> | .043 <sup>a</sup> |

a. Not corrected for ties.

b. Grouping Variable: Kidney failure

**Test Statistics<sup>b</sup>**

|                                | IL-1RA            | IL-1alpha         | IL-1beta          | IL-2              | IL-3              | IL-4              |
|--------------------------------|-------------------|-------------------|-------------------|-------------------|-------------------|-------------------|
| Mann-Whitney U                 | 50.000            | 29.500            | 61.000            | 68.500            | 84.000            | 90.000            |
| Wilcoxon W                     | 155.000           | 134.500           | 166.000           | 173.500           | 189.000           | 195.000           |
| Z                              | -1.990            | -3.023            | -1.545            | -1.611            | -1.038            | -.107             |
| Asymp. Sig. (2-tailed)         | .047              | .002              | .122              | .107              | .299              | .915              |
| Exact Sig. [2*(1-tailed Sig.)] | .048 <sup>a</sup> | .002 <sup>a</sup> | .155 <sup>a</sup> | .280 <sup>a</sup> | .756 <sup>a</sup> | .981 <sup>a</sup> |

a. Not corrected for ties.

b. Grouping Variable: Kidney failure

**Test Statistics<sup>b</sup>**

|                                | IL-5              | IL-6              | IL-7              | IL-8              | IP-10             | MCP-1             |
|--------------------------------|-------------------|-------------------|-------------------|-------------------|-------------------|-------------------|
| Mann-Whitney U                 | 84.000            | 52.000            | 82.000            | 63.000            | 35.000            | 30.000            |
| Wilcoxon W                     | 189.000           | 157.000           | 187.000           | 168.000           | 140.000           | 135.000           |
| Z                              | -1.038            | -1.893            | -.449             | -1.359            | -2.717            | -2.960            |
| Asymp. Sig. (2-tailed)         | .299              | .058              | .653              | .174              | .007              | .003              |
| Exact Sig. [2*(1-tailed Sig.)] | .756 <sup>a</sup> | .061 <sup>a</sup> | .685 <sup>a</sup> | .185 <sup>a</sup> | .006 <sup>a</sup> | .002 <sup>a</sup> |

a. Not corrected for ties.

b. Grouping Variable: Kidney failure

**Test Statistics<sup>b</sup>**

|                                | MIP-1alpha        | MIP-1beta         | TNFalpha          | TNFbeta           | VEGF              |
|--------------------------------|-------------------|-------------------|-------------------|-------------------|-------------------|
| Mann-Whitney U                 | 66.000            | 70.000            | 34.000            | 84.000            | 62.500            |
| Wilcoxon W                     | 171.000           | 175.000           | 139.000           | 189.000           | 167.500           |
| Z                              | -1.220            | -1.019            | -2.766            | -1.038            | -1.387            |
| Asymp. Sig. (2-tailed)         | .223              | .308              | .006              | .299              | .166              |
| Exact Sig. [2*(1-tailed Sig.)] | .239 <sup>a</sup> | .325 <sup>a</sup> | .005 <sup>a</sup> | .756 <sup>a</sup> | .169 <sup>a</sup> |

a. Not corrected for ties.

b. Grouping Variable: Kidney failure
