# Supplementary material for: Cytokine response during non-cerebral and cerebral malaria: evidence of a failure to control inflammation as a cause of death in African adults
Source: PeerJ. 2016 May 2;4:e1965. doi: 10.7717/peerj.1965 (PMC4860323; doi:10.7717/peerj.1965)
Supplement: Supplemental Information 1 [file peerj-04-1965-s002.xlsx]

## Sheet: EGF
	Luminex
	Data Interpretation Report																																						2015-01-15							15:02:27
		Batch Name:								YD-IPDk
		Protocol Name:								IPDk Sera
		Protocol Version:								2
		Test Name:								EGF
		Formula:								Y=a + ((b-a) / (1 + ((x / c) ^ d)) ^ f) (Logistic 5P Weighted)
			Most recent calibration and control results:
		MagCAL1:				Passed							2015-01-15 09:39:08
		CAL2:				Passed							2015-01-15 09:40:08
		MagCON1:				Passed							2015-01-15 09:41:05
		CON2:				Passed							2015-01-15 09:41:51
		Calibration results used for batch:
		MagCAL1
			Date:						2015-01-15 09:39:15																			Lot:								B32887
			DD Volt:						60.4																			DD Temp:								23.52
			CL1 Volt:						116.51																			CL1 Temp:								23.31
			CL2 Volt:						117.01																			CL2 Temp:								23.31
		CAL2
			Date:						2015-01-15 09:40:15																			Lot:								B32945
			RP1(1) Volt:						516
			RP1(2) Volt:						632.23
											EGF
			Logistic5p: y = a+((b-a)/(1+((x/c)^d))^f)
		Curve Data:
			R^2 = 0.999966766607866 Sum of Residuals = 1.32490677668646 Average Residuals = 0.22081779611441 Relative Sum of Squares Absolute = 2648.47010770353 Relative Sum of Squares Relative = 0.000255797318675503 Standard Error of the Estimate = 0.0159936649544594 Adjusted Coefficient of Multiple Determination = 0.999833833039332 Coefficient a = -0.956961440227834 Coefficient b = 16986.7277379764 Coeffic…
		Standards:
		Loc			Standard										Expected Conc					Net MFI							Test Result							Range										% Recovery					%CV of Replicates
		1,C1			Standard1										3.20					0							4.893																	152.9
		1,D1			Standard1										3.20					-1							<3.2																	NA
		1,E1			Standard2										16.00					5							14.031																	87.696
		1,F1			Standard2										16.00					8							17.769																	111.056
		1,G1			Standard3										80.00					115							80.373																	100.466
		1,H1			Standard3										80.00					115							80.373																	100.466
		1,A2			Standard4										400.00					1324.5							394.221																	98.555
		1,B2			Standard4										400.00					1355							400.916																	100.229
		1,C2			Standard5										2,000.00					7149							1990.68																	99.534
		1,D2			Standard5										2,000.00					7277							2042.664																	102.133
		1,E2			Standard6										10,000.00					14052							10776.945																	107.769
		1,F2			Standard6										10,000.00					13597							9126.588																	91.266
					Avg Standard1															-0.5							NA																						NaN
					Avg Standard2															6.5							15.9																						16.622
					Avg Standard3															115							80.373																						0
					Avg Standard4															1339.75							397.568																						1.191
					Avg Standard5															7213							2016.672																						1.823
					Avg Standard6															13824.5							9951.766																						11.726
	Controls:
																						No control Well records found.
	Samples:
		Loc			Sample ID											Net MFI								Test Result							Range									%CV of Replicates				Unit					Dilution Factor
		1,A1			Background0											-1																																	0.00
		1,B1			Background0											1																																	0.00
		1,G2			QC1											248.5								128.714																				pg/ml					1.00
		1,H2			QC1											229								122.337																				pg/ml					1.00
		1,A3			QC2											2694								693.35																				pg/ml					1.00
		1,B3			QC2											2711.5								697.262																				pg/ml					1.00
		1,C3			TM1											123								83.69																				pg/ml					1.00
		1,D3			TM2											8								17.769																				pg/ml					1.00
		1,E3			TM3											-2.5								<3.2																				pg/ml					1.00
		1,F3			TM4											18								27.481																				pg/ml					1.00
		1,G3			TM5											24								32.274																				pg/ml					1.00
		1,H3			TM6											758.5								265.614																				pg/ml					1.00
		1,A4			TM7											23								31.511																				pg/ml					1.00
		1,B4			TM8											-2								<3.2																				pg/ml					1.00
		1,C4			TM9											3								11.078																				pg/ml					1.00
		1,D4			TM10											22								30.734																				pg/ml					1.00
		1,E4			TM11											9								18.894																				pg/ml					1.00
		1,F4			TM12											9.5								19.439																				pg/ml					1.00
		1,G4			TM13											142.5								91.47																				pg/ml					1.00
		1,H4			TM14											35								39.992																				pg/ml					1.00
		1,A5			TM15											7								16.591																				pg/ml					1.00
		1,B5			TM16											-3								<3.2																				pg/ml					1.00
		1,C5			TM17											1201								366.953																				pg/ml					1.00
		1,D5			TM18											263								133.353																				pg/ml					1.00
		1,E5			PS1											39								42.557																				pg/ml					1.00
		1,F5			PS2											-2								<3.2																				pg/ml					1.00
		1,G5			PS3											13								22.99																				pg/ml					1.00
		Loc			Sample ID											Net MFI								Test Result							Range									%CV of Replicates				Unit					Dilution Factor
		1,H5			PS4											3								11.078																				pg/ml					1.00
		1,A6			PS5											5								14.031																				pg/ml					1.00
		1,B6			PS6											17								26.626																				pg/ml					1.00
		1,C6			PS7											440								184.994																				pg/ml					1.00
		1,D6			PS8											26								33.765																				pg/ml					1.00
		1,E6			PS9											79								64.257																				pg/ml					1.00
		1,F6			PS10											10								19.973																				pg/ml					1.00
		1,G6			PS11											-4								<3.2																				pg/ml					1.00
		1,H6			PS12											2								9.365																				pg/ml					1.00
		1,A7			PS13											15								24.854																				pg/ml					1.00
		1,B7			PS14											26								33.765																				pg/ml					1.00
		1,C7			PS15											16								25.751																				pg/ml					1.00
		1,D7			PS16											132								87.331																				pg/ml					1.00
		1,E7			PS17											2178.5								579.765																				pg/ml					1.00
		1,F7			NP1											12								22.017																				pg/ml					1.00
		1,G7			NP2											6								15.349																				pg/ml					1.00
		1,H7			NP3											2								9.365																				pg/ml					1.00
		1,A8			NP4											10								19.973																				pg/ml					1.00
		1,B8			NP5											7								16.591																				pg/ml					1.00
		1,C8			NP6											11								21.013																				pg/ml					1.00
		1,D8			NP7											18								27.481																				pg/ml					1.00
		1,E8			NP8											-2								<3.2																				pg/ml					1.00
		1,F8			NP9											3								11.078																				pg/ml					1.00
		1,G8			NP10											3								11.078																				pg/ml					1.00
		1,H8			NP11											11								21.013																				pg/ml					1.00
		1,A9			NP12											11								21.013																				pg/ml					1.00
		1,B9			NP13											4292.5								1075.899																				pg/ml					1.00
		1,C9			NP14											35								39.992																				pg/ml					1.00
		Loc			Sample ID											Net MFI								Test Result							Range									%CV of Replicates				Unit					Dilution Factor
		1,D9			NP15											1								7.383																				pg/ml					1.00
		1,E9			NP16											16								25.751																				pg/ml					1.00
		1,F9			NP17											19								28.318																				pg/ml					1.00
		1,G9			NP18											8								17.769																				pg/ml					1.00
		1,H9			NP19											1								7.383																				pg/ml					1.00
		1,A10			NP20											1								7.383																				pg/ml					1.00
		1,B10			NP21											-1								<3.2																				pg/ml					1.00
		1,C10			NP22											217								118.325																				pg/ml					1.00
		1,D10			NP23											3								11.078																				pg/ml					1.00
		1,E10			NP24											-1								<3.2																				pg/ml					1.00
		1,F10			NP25											19								28.318																				pg/ml					1.00
		1,G10			NP26											125								84.507																				pg/ml					1.00
		1,H10			NP27											2166								577.043																				pg/ml					1.00
		1,A11			NP28											1280								384.427																				pg/ml					1.00
		1,B11			NP29											55								51.942																				pg/ml					1.00
		1,C11			NP30											713.5								254.786																				pg/ml					1.00
		1,D11			NP31											4								12.617																				pg/ml					1.00
		1,E11			NP32											646								238.266																				pg/ml					1.00
		1,F11			NP33											22								30.734																				pg/ml					1.00
		1,G11			NP34											1734.5								483.47																				pg/ml					1.00
		1,H11			NP35											22								30.734																				pg/ml					1.00
		1,A12			NP36											221								119.67																				pg/ml					1.00
		1,B12			NP37											421								179.786																				pg/ml					1.00
		1,C12			NP38											3234								816.355																				pg/ml					1.00
		1,D12			NP39											1573								448.459																				pg/ml					1.00
		1,E12			NP40											-3								<3.2																				pg/ml					1.00
		1,F12			NP41											48								47.985																				pg/ml					1.00
		1,G12			NP42											144								92.053																				pg/ml					1.00
		Loc			Sample ID											Net MFI								Test Result							Range									%CV of Replicates				Unit					Dilution Factor
		1,H12			NP43											5								14.031																				pg/ml					1.00
					Avg Background0											0								NA																NaN
																															Page 8 of 8

## Sheet: Eotaxin
	Luminex
	Data Interpretation Report																																						2015-01-15							15:04:09
		Batch Name:								YD-IPDk
		Protocol Name:								IPDk Sera
		Protocol Version:								2
		Test Name:								Eotaxin
		Formula:								Y=a + ((b-a) / (1 + ((x / c) ^ d)) ^ f) (Logistic 5P Weighted)
			Most recent calibration and control results:
		MagCAL1:				Passed							2015-01-15 09:39:08
		CAL2:				Passed							2015-01-15 09:40:08
		MagCON1:				Passed							2015-01-15 09:41:05
		CON2:				Passed							2015-01-15 09:41:51
		Calibration results used for batch:
		MagCAL1
			Date:						2015-01-15 09:39:15																			Lot:								B32887
			DD Volt:						60.4																			DD Temp:								23.52
			CL1 Volt:						116.51																			CL1 Temp:								23.31
			CL2 Volt:						117.01																			CL2 Temp:								23.31
		CAL2
			Date:						2015-01-15 09:40:15																			Lot:								B32945
			RP1(1) Volt:						516
			RP1(2) Volt:						632.23
											Eotaxin
			Logistic5p: y = a+((b-a)/(1+((x/c)^d))^f)
		Curve Data:
			R^2 = 0.999147970301657 Sum of Residuals = 35.3453484261053 Average Residuals = 5.89089140435088 Relative Sum of Squares Absolute = 143207.59775256 Relative Sum of Squares Relative = 0.0248634705132704 Standard Error of the Estimate = 0.15768154778943 Adjusted Coefficient of Multiple Determination = 0.995739851508285 Coefficient a = -0.208174405339213 Coefficient b = 30785.8222860104 Coefficient …
		Standards:
		Loc			Standard										Expected Conc					Net MFI							Test Result							Range										% Recovery					%CV of Replicates
		1,C1			Standard1										3.20					1							3.199																	99.975
		1,D1			Standard1										3.20					1							3.199																	99.975
		1,E1			Standard2										16.00					18							16.11																	100.686
		1,F1			Standard2										16.00					18							16.11																	100.686
		1,G1			Standard3										80.00					224							77.687																	97.109
		1,H1			Standard3										80.00					230							79.051																	98.813
		1,A2			Standard4										400.00					2193.5							410.883																	102.721
		1,B2			Standard4										400.00					2254							420.508																	105.127
		1,C2			Standard5										2,000.00					9327.5							1904.526																	95.226
		1,D2			Standard5										2,000.00					9400.5							1925.9																	96.295
		1,E2			Standard6										10,000.00					20478							10103.236																	101.032
		1,F2			Standard6										10,000.00					20816.5							10721.415																	107.214
					Avg Standard1															1							3.199																						0
					Avg Standard2															18							16.11																						0
					Avg Standard3															227							78.369																						1.23
					Avg Standard4															2223.75							415.696																						1.637
					Avg Standard5															9364							1915.213																						0.789
					Avg Standard6															20647.25							10412.325																						4.198
	Controls:
																						No control Well records found.
	Samples:
		Loc			Sample ID											Net MFI								Test Result							Range									%CV of Replicates				Unit					Dilution Factor
		1,A1			Background0											0																																	0.00
		1,B1			Background0											0																																	0.00
		1,G2			QC1											534								139.935																				pg/ml					1.00
		1,H2			QC1											543								141.584																				pg/ml					1.00
		1,A3			QC2											4322.5								766.97																				pg/ml					1.00
		1,B3			QC2											4528								804.039																				pg/ml					1.00
		1,C3			TM1											147								59.072																				pg/ml					1.00
		1,D3			TM2											73								37.91																				pg/ml					1.00
		1,E3			TM3											76.5								39.037																				pg/ml					1.00
		1,F3			TM4											237								80.629																				pg/ml					1.00
		1,G3			TM5											140								57.249																				pg/ml					1.00
		1,H3			TM6											427								119.825																				pg/ml					1.00
		1,A4			TM7											199								71.887																				pg/ml					1.00
		1,B4			TM8											226								78.143																				pg/ml					1.00
		1,C4			TM9											164								63.393																				pg/ml					1.00
		1,D4			TM10											172.5								65.502																				pg/ml					1.00
		1,E4			TM11											162								62.892																				pg/ml					1.00
		1,F4			TM12											106								47.94																				pg/ml					1.00
		1,G4			TM13											233								79.729																				pg/ml					1.00
		1,H4			TM14											81								40.46																				pg/ml					1.00
		1,A5			TM15											168								64.389																				pg/ml					1.00
		1,B5			TM16											203.5								72.946																				pg/ml					1.00
		1,C5			TM17											208								73.998																				pg/ml					1.00
		1,D5			TM18											232								79.503																				pg/ml					1.00
		1,E5			PS1											-2								<3.2																				pg/ml					1.00
		1,F5			PS2											79								39.831																				pg/ml					1.00
		1,G5			PS3											126								53.514																				pg/ml					1.00
		Loc			Sample ID											Net MFI								Test Result							Range									%CV of Replicates				Unit					Dilution Factor
		1,H5			PS4											243								81.971																				pg/ml					1.00
		1,A6			PS5											250								83.526																				pg/ml					1.00
		1,B6			PS6											69								36.599																				pg/ml					1.00
		1,C6			PS7											111								49.363																				pg/ml					1.00
		1,D6			PS8											40.5								26.329																				pg/ml					1.00
		1,E6			PS9											75								38.556																				pg/ml					1.00
		1,F6			PS10											73								37.91																				pg/ml					1.00
		1,G6			PS11											70								36.929																				pg/ml					1.00
		1,H6			PS12											70								36.929																				pg/ml					1.00
		1,A7			PS13											124								52.97																				pg/ml					1.00
		1,B7			PS14											7								9.227																				pg/ml					1.00
		1,C7			PS15											110								49.08																				pg/ml					1.00
		1,D7			PS16											232								79.503																				pg/ml					1.00
		1,E7			PS17											407								115.946																				pg/ml					1.00
		1,F7			NP1											111.5								49.504																				pg/ml					1.00
		1,G7			NP2											338								102.186																				pg/ml					1.00
		1,H7			NP3											125								53.242																				pg/ml					1.00
		1,A8			NP4											125								53.242																				pg/ml					1.00
		1,B8			NP5											1575								312.855																				pg/ml					1.00
		1,C8			NP6											64								34.924																				pg/ml					1.00
		1,D8			NP7											31								22.364																				pg/ml					1.00
		1,E8			NP8											148								59.331																				pg/ml					1.00
		1,F8			NP9											208								73.998																				pg/ml					1.00
		1,G8			NP10											733								175.286																				pg/ml					1.00
		1,H8			NP11											1917.5								367.111																				pg/ml					1.00
		1,A9			NP12											309								96.197																				pg/ml					1.00
		1,B9			NP13											68								36.268																				pg/ml					1.00
		1,C9			NP14											324								99.312																				pg/ml					1.00
		Loc			Sample ID											Net MFI								Test Result							Range									%CV of Replicates				Unit					Dilution Factor
		1,D9			NP15											41								26.528																				pg/ml					1.00
		1,E9			NP16											513.5								136.156																				pg/ml					1.00
		1,F9			NP17											336								101.777																				pg/ml					1.00
		1,G9			NP18											46								28.471																				pg/ml					1.00
		1,H9			NP19											126.5								53.65																				pg/ml					1.00
		1,A10			NP20											107								48.226																				pg/ml					1.00
		1,B10			NP21											290								92.194																				pg/ml					1.00
		1,C10			NP22											99								45.911																				pg/ml					1.00
		1,D10			NP23											193.5								70.584																				pg/ml					1.00
		1,E10			NP24											833								192.376																				pg/ml					1.00
		1,F10			NP25											78								39.514																				pg/ml					1.00
		1,G10			NP26											64								34.924																				pg/ml					1.00
		1,H10			NP27											2415								446.198																				pg/ml					1.00
		1,A11			NP28											850.5								195.332																				pg/ml					1.00
		1,B11			NP29											72.5								37.747																				pg/ml					1.00
		1,C11			NP30											277								89.414																				pg/ml					1.00
		1,D11			NP31											175								66.116																				pg/ml					1.00
		1,E11			NP32											37								24.912																				pg/ml					1.00
		1,F11			NP33											211								74.696																				pg/ml					1.00
		1,G11			NP34											159.5								62.263																				pg/ml					1.00
		1,H11			NP35											18								16.11																				pg/ml					1.00
		1,A12			NP36											112.5								49.786																				pg/ml					1.00
		1,B12			NP37											267								87.253																				pg/ml					1.00
		1,C12			NP38											214								75.391																				pg/ml					1.00
		1,D12			NP39											53.5								31.251																				pg/ml					1.00
		1,E12			NP40											231								79.277																				pg/ml					1.00
		1,F12			NP41											865.5								197.859																				pg/ml					1.00
		1,G12			NP42											9								10.683																				pg/ml					1.00
		Loc			Sample ID											Net MFI								Test Result							Range									%CV of Replicates				Unit					Dilution Factor
		1,H12			NP43											183								68.065																				pg/ml					1.00
					Avg Background0											0								NA																NaN
																															Page 8 of 8

## Sheet: G-CSF
	Luminex
	Data Interpretation Report																																						2015-01-15							15:04:28
		Batch Name:								YD-IPDk
		Protocol Name:								IPDk Sera
		Protocol Version:								2
		Test Name:								G-CSF
		Formula:								Y=a + ((b-a) / (1 + ((x / c) ^ d)) ^ f) (Logistic 5P Weighted)
			Most recent calibration and control results:
		MagCAL1:				Passed							2015-01-15 09:39:08
		CAL2:				Passed							2015-01-15 09:40:08
		MagCON1:				Passed							2015-01-15 09:41:05
		CON2:				Passed							2015-01-15 09:41:51
		Calibration results used for batch:
		MagCAL1
			Date:						2015-01-15 09:39:15																			Lot:								B32887
			DD Volt:						60.4																			DD Temp:								23.52
			CL1 Volt:						116.51																			CL1 Temp:								23.31
			CL2 Volt:						117.01																			CL2 Temp:								23.31
		CAL2
			Date:						2015-01-15 09:40:15																			Lot:								B32945
			RP1(1) Volt:						516
			RP1(2) Volt:						632.23
											G-CSF
			Logistic5p: y = a+((b-a)/(1+((x/c)^d))^f)
		Curve Data:
			R^2 = 0.996569105682642 Sum of Residuals = 98.1882751762687 Average Residuals = 16.3647125293781 Relative Sum of Squares Absolute = 14460.7295814143 Relative Sum of Squares Relative = 0.356038991150576 Standard Error of the Estimate = 0.596690029370841 Adjusted Coefficient of Multiple Determination = 0.982845528413211 Coefficient a = 0.544150286446258 Coefficient b = 9163.99593851968 Coefficient …
		Standards:
		Loc			Standard										Expected Conc					Net MFI							Test Result							Range										% Recovery					%CV of Replicates
		1,C1			Standard1										3.20					2							3.151																	98.456
		1,D1			Standard1										3.20					2							3.151																	98.456
		1,E1			Standard2										16.00					10							17.206																	107.535
		1,F1			Standard2										16.00					10							17.206																	107.535
		1,G1			Standard3										80.00					47							72.936																	91.17
		1,H1			Standard3										80.00					53							81.434																	101.793
		1,A2			Standard4										400.00					278							369.121																	92.28
		1,B2			Standard4										400.00					291							384.779																	96.195
		1,C2			Standard5										2,000.00					1839							2052.694																	102.635
		1,D2			Standard5										2,000.00					1972.5							2187.506																	109.375
		1,E2			Standard6										10,000.00					8543							9720.147																	97.201
		1,F2			Standard6										10,000.00					8716.5							10328.231																	103.282
					Avg Standard1															2							3.151																						0
					Avg Standard2															10							17.206																						0
					Avg Standard3															50							77.185																						7.785
					Avg Standard4															284.5							376.95																						2.937
					Avg Standard5															1905.75							2120.1																						4.496
					Avg Standard6															8629.75							10024.189																						4.289
	Controls:
																						No control Well records found.
	Samples:
		Loc			Sample ID											Net MFI								Test Result							Range									%CV of Replicates				Unit					Dilution Factor
		1,A1			Background0											1																																	0.00
		1,B1			Background0											-1																																	0.00
		1,G2			QC1											103								149.488																				pg/ml					1.00
		1,H2			QC1											96								140.191																				pg/ml					1.00
		1,A3			QC2											651								799.653																				pg/ml					1.00
		1,B3			QC2											699								853.016																				pg/ml					1.00
		1,C3			TM1											24								39.234																				pg/ml					1.00
		1,D3			TM2											64								96.788																				pg/ml					1.00
		1,E3			TM3											25.5								41.503																				pg/ml					1.00
		1,F3			TM4											30								48.24																				pg/ml					1.00
		1,G3			TM5											40								62.891																				pg/ml					1.00
		1,H3			TM6											140								197.741																				pg/ml					1.00
		1,A4			TM7											26.5								43.01																				pg/ml					1.00
		1,B4			TM8											37								58.536																				pg/ml					1.00
		1,C4			TM9											14								23.696																				pg/ml					1.00
		1,D4			TM10											29								46.752																				pg/ml					1.00
		1,E4			TM11											53								81.434																				pg/ml					1.00
		1,F4			TM12											9								15.546																				pg/ml					1.00
		1,G4			TM13											24.5								39.992																				pg/ml					1.00
		1,H4			TM14											25								40.748																				pg/ml					1.00
		1,A5			TM15											28								45.259																				pg/ml					1.00
		1,B5			TM16											19								31.564																				pg/ml					1.00
		1,C5			TM17											48								74.359																				pg/ml					1.00
		1,D5			TM18											29								46.752																				pg/ml					1.00
		1,E5			PS1											79								117.337																				pg/ml					1.00
		1,F5			PS2											5								8.693																				pg/ml					1.00
		1,G5			PS3											14								23.696																				pg/ml					1.00
		Loc			Sample ID											Net MFI								Test Result							Range									%CV of Replicates				Unit					Dilution Factor
		1,H5			PS4											30								48.24																				pg/ml					1.00
		1,A6			PS5											59								89.843																				pg/ml					1.00
		1,B6			PS6											102								148.164																				pg/ml					1.00
		1,C6			PS7											22								36.186																				pg/ml					1.00
		1,D6			PS8											304								400.373																				pg/ml					1.00
		1,E6			PS9											346.5								450.936																				pg/ml					1.00
		1,F6			PS10											17								28.444																				pg/ml					1.00
		1,G6			PS11											30								48.24																				pg/ml					1.00
		1,H6			PS12											17								28.444																				pg/ml					1.00
		1,A7			PS13											774								935.726																				pg/ml					1.00
		1,B7			PS14											114								163.98																				pg/ml					1.00
		1,C7			PS15											129								183.536																				pg/ml					1.00
		1,D7			PS16											55								84.247																				pg/ml					1.00
		1,E7			PS17											26								42.257																				pg/ml					1.00
		1,F7			NP1											73								109.166																				pg/ml					1.00
		1,G7			NP2											63								95.403																				pg/ml					1.00
		1,H7			NP3											128								182.239																				pg/ml					1.00
		1,A8			NP4											95								138.858																				pg/ml					1.00
		1,B8			NP5											1180								1372.187																				pg/ml					1.00
		1,C8			NP6											147								206.727																				pg/ml					1.00
		1,D8			NP7											109								157.41																				pg/ml					1.00
		1,E8			NP8											22								36.186																				pg/ml					1.00
		1,F8			NP9											12								20.477																				pg/ml					1.00
		1,G8			NP10											117								167.91																				pg/ml					1.00
		1,H8			NP11											962.5								1140.487																				pg/ml					1.00
		1,A9			NP12											6338.5								6420.944																				pg/ml					1.00
		1,B9			NP13											54								82.842																				pg/ml					1.00
		1,C9			NP14											7408.5								7637.08																				pg/ml					1.00
		Loc			Sample ID											Net MFI								Test Result							Range									%CV of Replicates				Unit					Dilution Factor
		1,D9			NP15											23								37.713																				pg/ml					1.00
		1,E9			NP16											128								182.239																				pg/ml					1.00
		1,F9			NP17											42								65.777																				pg/ml					1.00
		1,G9			NP18											186								256.111																				pg/ml					1.00
		1,H9			NP19											6								10.446																				pg/ml					1.00
		1,A10			NP20											359								465.695																				pg/ml					1.00
		1,B10			NP21											347								451.527																				pg/ml					1.00
		1,C10			NP22											82.5								122.077																				pg/ml					1.00
		1,D10			NP23											76								113.259																				pg/ml					1.00
		1,E10			NP24											10768								>10000																				pg/ml					1.00
		1,F10			NP25											17								28.444																				pg/ml					1.00
		1,G10			NP26											22								36.186																				pg/ml					1.00
		1,H10			NP27											424								541.71																				pg/ml					1.00
		1,A11			NP28											190.5								261.743																				pg/ml					1.00
		1,B11			NP29											69								103.683																				pg/ml					1.00
		1,C11			NP30											78								115.98																				pg/ml					1.00
		1,D11			NP31											98								142.854																				pg/ml					1.00
		1,E11			NP32											55								84.247																				pg/ml					1.00
		1,F11			NP33											302								397.978																				pg/ml					1.00
		1,G11			NP34											102								148.164																				pg/ml					1.00
		1,H11			NP35											36								57.078																				pg/ml					1.00
		1,A12			NP36											28								45.259																				pg/ml					1.00
		1,B12			NP37											64								96.788																				pg/ml					1.00
		1,C12			NP38											38								59.991																				pg/ml					1.00
		1,D12			NP39											21.5								35.42																				pg/ml					1.00
		1,E12			NP40											81								120.048																				pg/ml					1.00
		1,F12			NP41											128.5								182.888																				pg/ml					1.00
		1,G12			NP42											0.5								<3.2																				pg/ml					1.00
		Loc			Sample ID											Net MFI								Test Result							Range									%CV of Replicates				Unit					Dilution Factor
		1,H12			NP43											61								92.627																				pg/ml					1.00
					Avg Background0											0								NA																NaN
																															Page 8 of 8

## Sheet: GM-CSF
	Luminex
	Data Interpretation Report																																						2015-01-15							15:04:50
		Batch Name:								YD-IPDk
		Protocol Name:								IPDk Sera
		Protocol Version:								2
		Test Name:								GM-CSF
		Formula:								Y=a + ((b-a) / (1 + ((x / c) ^ d)) ^ f) (Logistic 5P Weighted)
			Most recent calibration and control results:
		MagCAL1:				Passed							2015-01-15 09:39:08
		CAL2:				Passed							2015-01-15 09:40:08
		MagCON1:				Passed							2015-01-15 09:41:05
		CON2:				Passed							2015-01-15 09:41:51
		Calibration results used for batch:
		MagCAL1
			Date:						2015-01-15 09:39:15																			Lot:								B32887
			DD Volt:						60.4																			DD Temp:								23.52
			CL1 Volt:						116.51																			CL1 Temp:								23.31
			CL2 Volt:						117.01																			CL2 Temp:								23.31
		CAL2
			Date:						2015-01-15 09:40:15																			Lot:								B32945
			RP1(1) Volt:						516
			RP1(2) Volt:						632.23
											GM-CSF
			Logistic5p: y = a+((b-a)/(1+((x/c)^d))^f)
		Curve Data:
			R^2 = 0.999107005993035 Sum of Residuals = 61.2891075854676 Average Residuals = 10.2148512642446 Relative Sum of Squares Absolute = 7229.95551271761 Relative Sum of Squares Relative = 1.27416642003057 Standard Error of the Estimate = 1.12878980329846 Adjusted Coefficient of Multiple Determination = 0.995535029965176 Coefficient a = -0.153646388155661 Coefficient b = 8573.27200107776 Coefficient c…
		Standards:
		Loc			Standard										Expected Conc					Net MFI							Test Result							Range										% Recovery					%CV of Replicates
		1,C1			Standard1										3.20					7.5							3.177																	99.291
		1,D1			Standard1										3.20					7.5							3.177																	99.291
		1,E1			Standard2										16.00					34.5							16.445																	102.781
		1,F1			Standard2										16.00					35.5							16.962																	106.014
		1,G1			Standard3										80.00					141							75.858																	94.823
		1,H1			Standard3										80.00					147.5							79.668																	99.585
		1,A2			Standard4										400.00					612.5							374.966																	93.742
		1,B2			Standard4										400.00					649.5							399.682																	99.921
		1,C2			Standard5										2,000.00					2910							2044.735																	102.237
		1,D2			Standard5										2,000.00					2958.5							2081.862																	104.093
		1,E2			Standard6										10,000.00					8424.5							8369.079																	83.691
		1,F2			Standard6										10,000.00					8643.5							>10000																	NA
					Avg Standard1															7.5							3.177																						0
					Avg Standard2															35							16.704																						2.19
					Avg Standard3															144.25							77.763																						3.465
					Avg Standard4															631							387.324																						4.512
					Avg Standard5															2934.25							2063.299																						1.272
					Avg Standard6															8534							NA																						NaN
	Controls:
																						No control Well records found.
	Samples:
		Loc			Sample ID											Net MFI								Test Result							Range									%CV of Replicates				Unit					Dilution Factor
		1,A1			Background0											0.5																																	0.00
		1,B1			Background0											-0.5																																	0.00
		1,G2			QC1											203.5								113.058																				pg/ml					1.00
		1,H2			QC1											190.5								105.225																				pg/ml					1.00
		1,A3			QC2											932								592.12																				pg/ml					1.00
		1,B3			QC2											971.5								619.484																				pg/ml					1.00
		1,C3			TM1											16.5								7.406																				pg/ml					1.00
		1,D3			TM2											7.5								3.177																				pg/ml					1.00
		1,E3			TM3											3.5								1.421																				pg/ml					1.00
		1,F3			TM4											3.5								1.421																				pg/ml					1.00
		1,G3			TM5											21.5								9.857																				pg/ml					1.00
		1,H3			TM6											3.5								1.421																				pg/ml					1.00
		1,A4			TM7											0.5								0.218																				pg/ml					1.00
		1,B4			TM8											6.5								2.728																				pg/ml					1.00
		1,C4			TM9											0.5								0.218																				pg/ml					1.00
		1,D4			TM10											6.5								2.728																				pg/ml					1.00
		1,E4			TM11											46								22.465																				pg/ml					1.00
		1,F4			TM12											13.5								5.966																				pg/ml					1.00
		1,G4			TM13											4.5								1.849																				pg/ml					1.00
		1,H4			TM14											4.5								1.849																				pg/ml					1.00
		1,A5			TM15											84.5								43.48																				pg/ml					1.00
		1,B5			TM16											2.5								1.003																				pg/ml					1.00
		1,C5			TM17											18.5								8.38																				pg/ml					1.00
		1,D5			TM18											46.5								22.73																				pg/ml					1.00
		1,E5			PS1											17.5								7.892																				pg/ml					1.00
		1,F5			PS2											2.5								1.003																				pg/ml					1.00
		1,G5			PS3											7.5								3.177																				pg/ml					1.00
		Loc			Sample ID											Net MFI								Test Result							Range									%CV of Replicates				Unit					Dilution Factor
		1,H5			PS4											15.5								6.924																				pg/ml					1.00
		1,A6			PS5											18.5								8.38																				pg/ml					1.00
		1,B6			PS6											32.5								15.414																				pg/ml					1.00
		1,C6			PS7											10.5								4.554																				pg/ml					1.00
		1,D6			PS8											11.5								5.021																				pg/ml					1.00
		1,E6			PS9											27.5								12.863																				pg/ml					1.00
		1,F6			PS10											0.5								0.218																				pg/ml					1.00
		1,G6			PS11											9.5								4.091																				pg/ml					1.00
		1,H6			PS12											19.5								8.87																				pg/ml					1.00
		1,A7			PS13											83								42.642																				pg/ml					1.00
		1,B7			PS14											20.5								9.362																				pg/ml					1.00
		1,C7			PS15											28.5								13.371																				pg/ml					1.00
		1,D7			PS16											36.5								17.481																				pg/ml					1.00
		1,E7			PS17											16.5								7.406																				pg/ml					1.00
		1,F7			NP1											10.5								4.554																				pg/ml					1.00
		1,G7			NP2											42.5								20.617																				pg/ml					1.00
		1,H7			NP3											23.5								10.852																				pg/ml					1.00
		1,A8			NP4											17.5								7.892																				pg/ml					1.00
		1,B8			NP5											96.5								50.23																				pg/ml					1.00
		1,C8			NP6											10.5								4.554																				pg/ml					1.00
		1,D8			NP7											6.5								2.728																				pg/ml					1.00
		1,E8			NP8											7.5								3.177																				pg/ml					1.00
		1,F8			NP9											5.5								2.285																				pg/ml					1.00
		1,G8			NP10											33								15.672																				pg/ml					1.00
		1,H8			NP11											92.5								47.971																				pg/ml					1.00
		1,A9			NP12											98.5								51.362																				pg/ml					1.00
		1,B9			NP13											27.5								12.863																				pg/ml					1.00
		1,C9			NP14											27.5								12.863																				pg/ml					1.00
		Loc			Sample ID											Net MFI								Test Result							Range									%CV of Replicates				Unit					Dilution Factor
		1,D9			NP15											9.5								4.091																				pg/ml					1.00
		1,E9			NP16											89								46.002																				pg/ml					1.00
		1,F9			NP17											51								25.127																				pg/ml					1.00
		1,G9			NP18											164.5								89.702																				pg/ml					1.00
		1,H9			NP19											-2.5								<3.2																				pg/ml					1.00
		1,A10			NP20											41.5								20.092																				pg/ml					1.00
		1,B10			NP21											41.5								20.092																				pg/ml					1.00
		1,C10			NP22											19.5								8.87																				pg/ml					1.00
		1,D10			NP23											9.5								4.091																				pg/ml					1.00
		1,E10			NP24											24.5								11.352																				pg/ml					1.00
		1,F10			NP25											9.5								4.091																				pg/ml					1.00
		1,G10			NP26											0.5								0.218																				pg/ml					1.00
		1,H10			NP27											2605.5								1812.938																				pg/ml					1.00
		1,A11			NP28											723.5								449.483																				pg/ml					1.00
		1,B11			NP29											7.5								3.177																				pg/ml					1.00
		1,C11			NP30											28.5								13.371																				pg/ml					1.00
		1,D11			NP31											63.5								31.878																				pg/ml					1.00
		1,E11			NP32											20.5								9.362																				pg/ml					1.00
		1,F11			NP33											69.5								35.163																				pg/ml					1.00
		1,G11			NP34											54.5								27.004																				pg/ml					1.00
		1,H11			NP35											1.5								0.599																				pg/ml					1.00
		1,A12			NP36											19.5								8.87																				pg/ml					1.00
		1,B12			NP37											29.5								13.879																				pg/ml					1.00
		1,C12			NP38											26.5								12.358																				pg/ml					1.00
		1,D12			NP39											9.5								4.091																				pg/ml					1.00
		1,E12			NP40											9.5								4.091																				pg/ml					1.00
		1,F12			NP41											56								27.812																				pg/ml					1.00
		1,G12			NP42											-0.5								<3.2																				pg/ml					1.00
		Loc			Sample ID											Net MFI								Test Result							Range									%CV of Replicates				Unit					Dilution Factor
		1,H12			NP43											41.5								20.092																				pg/ml					1.00
					Avg Background0											0								NA																NaN
																															Page 8 of 8

## Sheet: IFNa2
	Luminex
	Data Interpretation Report																																						2015-01-15							15:05:06
		Batch Name:								YD-IPDk
		Protocol Name:								IPDk Sera
		Protocol Version:								2
		Test Name:								IFN-alpha2
		Formula:								Y=a + ((b-a) / (1 + ((x / c) ^ d)) ^ f) (Logistic 5P Weighted)
			Most recent calibration and control results:
		MagCAL1:				Passed							2015-01-15 09:39:08
		CAL2:				Passed							2015-01-15 09:40:08
		MagCON1:				Passed							2015-01-15 09:41:05
		CON2:				Passed							2015-01-15 09:41:51
		Calibration results used for batch:
		MagCAL1
			Date:						2015-01-15 09:39:15																			Lot:								B32887
			DD Volt:						60.4																			DD Temp:								23.52
			CL1 Volt:						116.51																			CL1 Temp:								23.31
			CL2 Volt:						117.01																			CL2 Temp:								23.31
		CAL2
			Date:						2015-01-15 09:40:15																			Lot:								B32945
			RP1(1) Volt:						516
			RP1(2) Volt:						632.23
											IFN-alpha2
			Logistic5p: y = a+((b-a)/(1+((x/c)^d))^f)
		Curve Data:
			R^2 = 0.989654049802373 Sum of Residuals = 113.38740628674 Average Residuals = 18.89790104779 Relative Sum of Squares Absolute = 16562.6898650854 Relative Sum of Squares Relative = 0.56074617722003 Standard Error of the Estimate = 0.748829872013684 Adjusted Coefficient of Multiple Determination = 0.948270249011865 Coefficient a = 1.05556587369838 Coefficient b = 6625.63269954304 Coefficient c = 7…
		Standards:
		Loc			Standard										Expected Conc					Net MFI							Test Result							Range										% Recovery					%CV of Replicates
		1,C1			Standard1										3.20					1.5							2.913																	91.025
		1,D1			Standard1										3.20					1.5							2.913																	91.025
		1,E1			Standard2										16.00					5.5							18.987																	118.667
		1,F1			Standard2										16.00					5.5							18.987																	118.667
		1,G1			Standard3										80.00					23.5							70.961																	88.701
		1,H1			Standard3										80.00					26.5							78.592																	98.239
		1,A2			Standard4										400.00					165.5							359.061																	89.765
		1,B2			Standard4										400.00					185.5							394.229																	98.557
		1,C2			Standard5										2,000.00					1478.5							2145.031																	107.252
		1,D2			Standard5										2,000.00					1491							2159.795																	107.99
		1,E2			Standard6										10,000.00					6595.5							10428.791																	104.288
		1,F2			Standard6										10,000.00					6567.5							9698.559																	96.986
					Avg Standard1															1.5							2.913																						0
					Avg Standard2															5.5							18.987																						0
					Avg Standard3															25							74.776																						7.216
					Avg Standard4															175.5							376.645																						6.603
					Avg Standard5															1484.75							2152.413																						0.485
					Avg Standard6															6581.5							10063.675																						5.131
	Controls:
																						No control Well records found.
	Samples:
		Loc			Sample ID											Net MFI								Test Result							Range									%CV of Replicates				Unit					Dilution Factor
		1,A1			Background0											-0.5																																	0.00
		1,B1			Background0											0.5																																	0.00
		1,G2			QC1											37.5								105.296																				pg/ml					1.00
		1,H2			QC1											37.5								105.296																				pg/ml					1.00
		1,A3			QC2											299.5								583.311																				pg/ml					1.00
		1,B3			QC2											320.5								616.514																				pg/ml					1.00
		1,C3			TM1											2.5								7.604																				pg/ml					1.00
		1,D3			TM2											2.5								7.604																				pg/ml					1.00
		1,E3			TM3											1.5								2.913																				pg/ml					1.00
		1,F3			TM4											11.5								38.067																				pg/ml					1.00
		1,G3			TM5											1.5								2.913																				pg/ml					1.00
		1,H3			TM6											0.5								<3.2																				pg/ml					1.00
		1,A4			TM7											0.5								<3.2																				pg/ml					1.00
		1,B4			TM8											1.5								2.913																				pg/ml					1.00
		1,C4			TM9											1.5								2.913																				pg/ml					1.00
		1,D4			TM10											14.5								46.754																				pg/ml					1.00
		1,E4			TM11											6.5								22.398																				pg/ml					1.00
		1,F4			TM12											12.5								41.009																				pg/ml					1.00
		1,G4			TM13											7.5								25.693																				pg/ml					1.00
		1,H4			TM14											6.5								22.398																				pg/ml					1.00
		1,A5			TM15											7.5								25.693																				pg/ml					1.00
		1,B5			TM16											1.5								2.913																				pg/ml					1.00
		1,C5			TM17											25.5								76.068																				pg/ml					1.00
		1,D5			TM18											20.5								63.138																				pg/ml					1.00
		1,E5			PS1											4								13.579																				pg/ml					1.00
		1,F5			PS2											3.5								11.67																				pg/ml					1.00
		1,G5			PS3											7.5								25.693																				pg/ml					1.00
		Loc			Sample ID											Net MFI								Test Result							Range									%CV of Replicates				Unit					Dilution Factor
		1,H5			PS4											15.5								49.566																				pg/ml					1.00
		1,A6			PS5											176								377.618																				pg/ml					1.00
		1,B6			PS6											28.5								83.585																				pg/ml					1.00
		1,C6			PS7											5.5								18.987																				pg/ml					1.00
		1,D6			PS8											3.5								11.67																				pg/ml					1.00
		1,E6			PS9											12.5								41.009																				pg/ml					1.00
		1,F6			PS10											2.5								7.604																				pg/ml					1.00
		1,G6			PS11											5.5								18.987																				pg/ml					1.00
		1,H6			PS12											18.5								57.798																				pg/ml					1.00
		1,A7			PS13											36.5								102.938																				pg/ml					1.00
		1,B7			PS14											4.5								15.429																				pg/ml					1.00
		1,C7			PS15											171								368.807																				pg/ml					1.00
		1,D7			PS16											35.5								100.567																				pg/ml					1.00
		1,E7			PS17											14.5								46.754																				pg/ml					1.00
		1,F7			NP1											3.5								11.67																				pg/ml					1.00
		1,G7			NP2											18.5								57.798																				pg/ml					1.00
		1,H7			NP3											0.5								<3.2																				pg/ml					1.00
		1,A8			NP4											6.5								22.398																				pg/ml					1.00
		1,B8			NP5											27								79.847																				pg/ml					1.00
		1,C8			NP6											24								72.245																				pg/ml					1.00
		1,D8			NP7											14.5								46.754																				pg/ml					1.00
		1,E8			NP8											7.5								25.693																				pg/ml					1.00
		1,F8			NP9											4.5								15.429																				pg/ml					1.00
		1,G8			NP10											12.5								41.009																				pg/ml					1.00
		1,H8			NP11											43.5								119.206																				pg/ml					1.00
		1,A9			NP12											40.5								112.3																				pg/ml					1.00
		1,B9			NP13											10.5								35.072																				pg/ml					1.00
		1,C9			NP14											16								50.959																				pg/ml					1.00
		Loc			Sample ID											Net MFI								Test Result							Range									%CV of Replicates				Unit					Dilution Factor
		1,D9			NP15											4.5								15.429																				pg/ml					1.00
		1,E9			NP16											18.5								57.798																				pg/ml					1.00
		1,F9			NP17											17.5								55.086																				pg/ml					1.00
		1,G9			NP18											52.5								139.41																				pg/ml					1.00
		1,H9			NP19											-1.5								<3.2																				pg/ml					1.00
		1,A10			NP20											20.5								63.138																				pg/ml					1.00
		1,B10			NP21											10.5								35.072																				pg/ml					1.00
		1,C10			NP22											0.5								<3.2																				pg/ml					1.00
		1,D10			NP23											1.5								2.913																				pg/ml					1.00
		1,E10			NP24											9.5								32.018																				pg/ml					1.00
		1,F10			NP25											5.5								18.987																				pg/ml					1.00
		1,G10			NP26											-0.5								<3.2																				pg/ml					1.00
		1,H10			NP27											1387.5								2036.838																				pg/ml					1.00
		1,A11			NP28											487.5								868.228																				pg/ml					1.00
		1,B11			NP29											1								<3.2																				pg/ml					1.00
		1,C11			NP30											51.5								137.199																				pg/ml					1.00
		1,D11			NP31											10.5								35.072																				pg/ml					1.00
		1,E11			NP32											9.5								32.018																				pg/ml					1.00
		1,F11			NP33											22.5								68.376																				pg/ml					1.00
		1,G11			NP34											59.5								154.667																				pg/ml					1.00
		1,H11			NP35											1.5								2.913																				pg/ml					1.00
		1,A12			NP36											24								72.245																				pg/ml					1.00
		1,B12			NP37											3.5								11.67																				pg/ml					1.00
		1,C12			NP38											20.5								63.138																				pg/ml					1.00
		1,D12			NP39											8								27.305																				pg/ml					1.00
		1,E12			NP40											3.5								11.67																				pg/ml					1.00
		1,F12			NP41											13.5								43.903																				pg/ml					1.00
		1,G12			NP42											-5.5								<3.2																				pg/ml					1.00
		Loc			Sample ID											Net MFI								Test Result							Range									%CV of Replicates				Unit					Dilution Factor
		1,H12			NP43											13.5								43.903																				pg/ml					1.00
					Avg Background0											0								NA																NaN
																															Page 8 of 8

## Sheet: IFNg
	Luminex
	Data Interpretation Report																																						2015-01-15							15:05:18
		Batch Name:								YD-IPDk
		Protocol Name:								IPDk Sera
		Protocol Version:								2
		Test Name:								IFN-g
		Formula:								Y=a + ((b-a) / (1 + ((x / c) ^ d)) ^ f) (Logistic 5P Weighted)
			Most recent calibration and control results:
		MagCAL1:				Passed							2015-01-15 09:39:08
		CAL2:				Passed							2015-01-15 09:40:08
		MagCON1:				Passed							2015-01-15 09:41:05
		CON2:				Passed							2015-01-15 09:41:51
		Calibration results used for batch:
		MagCAL1
			Date:						2015-01-15 09:39:15																			Lot:								B32887
			DD Volt:						60.4																			DD Temp:								23.52
			CL1 Volt:						116.51																			CL1 Temp:								23.31
			CL2 Volt:						117.01																			CL2 Temp:								23.31
		CAL2
			Date:						2015-01-15 09:40:15																			Lot:								B32945
			RP1(1) Volt:						516
			RP1(2) Volt:						632.23
											IFN-g
			Logistic5p: y = a+((b-a)/(1+((x/c)^d))^f)
		Curve Data:
			R^2 = 0.99999563311575 Sum of Residuals = -0.00874006013172934 Average Residuals = -0.00145667668862156 Relative Sum of Squares Absolute = 7.64131778222204 Relative Sum of Squares Relative = 0.00288831727912118 Standard Error of the Estimate = 0.0537430672656593 Adjusted Coefficient of Multiple Determination = 0.999978165578752 Coefficient a = -0.643583976814325 Coefficient b = 30069.9839120434 C…
		Standards:
		Loc			Standard										Expected Conc					Net MFI							Test Result							Range										% Recovery					%CV of Replicates
		1,C1			Standard1										3.20					5							3.201																	100.019
		1,D1			Standard1										3.20					5							3.201																	100.019
		1,E1			Standard2										16.00					29							16.525																	103.279
		1,F1			Standard2										16.00					27							15.421																	96.379
		1,G1			Standard3										80.00					146							80.537																	100.672
		1,H1			Standard3										80.00					145							79.992																	99.991
		1,A2			Standard4										400.00					717							392.213																	98.053
		1,B2			Standard4										400.00					742							405.957																	101.489
		1,C2			Standard5										2,000.00					3387							1951.401																	97.57
		1,D2			Standard5										2,000.00					3546							2051.346																	102.567
		1,E2			Standard6										10,000.00					12521							10018.113																	100.181
		1,F2			Standard6										10,000.00					12491							9979.926																	99.799
					Avg Standard1															5							3.201																						0
					Avg Standard2															28							15.973																						4.887
					Avg Standard3															145.5							80.265																						0.48
					Avg Standard4															729.5							399.085																						2.435
					Avg Standard5															3466.5							2001.374																						3.531
					Avg Standard6															12506							9999.02																						0.27
	Controls:
																						No control Well records found.
	Samples:
		Loc			Sample ID											Net MFI								Test Result							Range									%CV of Replicates				Unit					Dilution Factor
		1,A1			Background0											0																																	0.00
		1,B1			Background0											0																																	0.00
		1,G2			QC1											313.5								171.704																				pg/ml					1.00
		1,H2			QC1											293								160.547																				pg/ml					1.00
		1,A3			QC2											1384								763.37																				pg/ml					1.00
		1,B3			QC2											1478								816.511																				pg/ml					1.00
		1,C3			TM1											2								1.511																				pg/ml					1.00
		1,D3			TM2											-2								<3.2																				pg/ml					1.00
		1,E3			TM3											-3								<3.2																				pg/ml					1.00
		1,F3			TM4											5								3.201																				pg/ml					1.00
		1,G3			TM5											0								0.373																				pg/ml					1.00
		1,H3			TM6											-4								<3.2																				pg/ml					1.00
		1,A4			TM7											-2								<3.2																				pg/ml					1.00
		1,B4			TM8											4								2.639																				pg/ml					1.00
		1,C4			TM9											17								9.888																				pg/ml					1.00
		1,D4			TM10											0								0.373																				pg/ml					1.00
		1,E4			TM11											24								13.763																				pg/ml					1.00
		1,F4			TM12											-3								<3.2																				pg/ml					1.00
		1,G4			TM13											13								7.666																				pg/ml					1.00
		1,H4			TM14											0								0.373																				pg/ml					1.00
		1,A5			TM15											9								5.438																				pg/ml					1.00
		1,B5			TM16											-1								<3.2																				pg/ml					1.00
		1,C5			TM17											24								13.763																				pg/ml					1.00
		1,D5			TM18											9								5.438																				pg/ml					1.00
		1,E5			PS1											11								6.553																				pg/ml					1.00
		1,F5			PS2											0								0.373																				pg/ml					1.00
		1,G5			PS3											19								10.996																				pg/ml					1.00
		Loc			Sample ID											Net MFI								Test Result							Range									%CV of Replicates				Unit					Dilution Factor
		1,H5			PS4											12								7.11																				pg/ml					1.00
		1,A6			PS5											56								31.374																				pg/ml					1.00
		1,B6			PS6											46.5								26.158																				pg/ml					1.00
		1,C6			PS7											9								5.438																				pg/ml					1.00
		1,D6			PS8											9								5.438																				pg/ml					1.00
		1,E6			PS9											24								13.763																				pg/ml					1.00
		1,F6			PS10											-2								<3.2																				pg/ml					1.00
		1,G6			PS11											2								1.511																				pg/ml					1.00
		1,H6			PS12											7.5								4.601																				pg/ml					1.00
		1,A7			PS13											157.5								86.802																				pg/ml					1.00
		1,B7			PS14											4								2.639																				pg/ml					1.00
		1,C7			PS15											38								21.484																				pg/ml					1.00
		1,D7			PS16											345								188.852																				pg/ml					1.00
		1,E7			PS17											19								10.996																				pg/ml					1.00
		1,F7			NP1											-1								<3.2																				pg/ml					1.00
		1,G7			NP2											46								25.884																				pg/ml					1.00
		1,H7			NP3											4								2.639																				pg/ml					1.00
		1,A8			NP4											4								2.639																				pg/ml					1.00
		1,B8			NP5											28								15.973																				pg/ml					1.00
		1,C8			NP6											8.5								5.159																				pg/ml					1.00
		1,D8			NP7											4								2.639																				pg/ml					1.00
		1,E8			NP8											4								2.639																				pg/ml					1.00
		1,F8			NP9											2								1.511																				pg/ml					1.00
		1,G8			NP10											32.5								18.455																				pg/ml					1.00
		1,H8			NP11											92								51.078																				pg/ml					1.00
		1,A9			NP12											13								7.666																				pg/ml					1.00
		1,B9			NP13											131								72.362																				pg/ml					1.00
		1,C9			NP14											8								4.88																				pg/ml					1.00
		Loc			Sample ID											Net MFI								Test Result							Range									%CV of Replicates				Unit					Dilution Factor
		1,D9			NP15											3								2.076																				pg/ml					1.00
		1,E9			NP16											77								42.877																				pg/ml					1.00
		1,F9			NP17											47								26.433																				pg/ml					1.00
		1,G9			NP18											50								28.081																				pg/ml					1.00
		1,H9			NP19											8								4.88																				pg/ml					1.00
		1,A10			NP20											9								5.438																				pg/ml					1.00
		1,B10			NP21											4								2.639																				pg/ml					1.00
		1,C10			NP22											2.5								1.794																				pg/ml					1.00
		1,D10			NP23											4								2.639																				pg/ml					1.00
		1,E10			NP24											11								6.553																				pg/ml					1.00
		1,F10			NP25											-1								<3.2																				pg/ml					1.00
		1,G10			NP26											2								1.511																				pg/ml					1.00
		1,H10			NP27											483								264.076																				pg/ml					1.00
		1,A11			NP28											225								123.547																				pg/ml					1.00
		1,B11			NP29											-1								<3.2																				pg/ml					1.00
		1,C11			NP30											41.5								23.41																				pg/ml					1.00
		1,D11			NP31											67								37.403																				pg/ml					1.00
		1,E11			NP32											6								3.761																				pg/ml					1.00
		1,F11			NP33											253								138.782																				pg/ml					1.00
		1,G11			NP34											48								26.982																				pg/ml					1.00
		1,H11			NP35											-4								<3.2																				pg/ml					1.00
		1,A12			NP36											27								15.421																				pg/ml					1.00
		1,B12			NP37											22								12.657																				pg/ml					1.00
		1,C12			NP38											21								12.104																				pg/ml					1.00
		1,D12			NP39											2								1.511																				pg/ml					1.00
		1,E12			NP40											8								4.88																				pg/ml					1.00
		1,F12			NP41											17								9.888																				pg/ml					1.00
		1,G12			NP42											-3								<3.2																				pg/ml					1.00
		Loc			Sample ID											Net MFI								Test Result							Range									%CV of Replicates				Unit					Dilution Factor
		1,H12			NP43											6								3.761																				pg/ml					1.00
					Avg Background0											0								NA																NaN
																															Page 8 of 8

## Sheet: IL-1a
	Luminex
	Data Interpretation Report																																						2015-01-15							15:06:43
		Batch Name:								YD-IPDk
		Protocol Name:								IPDk Sera
		Protocol Version:								2
		Test Name:								IL-1alpha
		Formula:								Y=a + ((b-a) / (1 + ((x / c) ^ d)) ^ f) (Logistic 5P Weighted)
			Most recent calibration and control results:
		MagCAL1:				Passed							2015-01-15 09:39:08
		CAL2:				Passed							2015-01-15 09:40:08
		MagCON1:				Passed							2015-01-15 09:41:05
		CON2:				Passed							2015-01-15 09:41:51
		Calibration results used for batch:
		MagCAL1
			Date:						2015-01-15 09:39:15																			Lot:								B32887
			DD Volt:						60.4																			DD Temp:								23.52
			CL1 Volt:						116.51																			CL1 Temp:								23.31
			CL2 Volt:						117.01																			CL2 Temp:								23.31
		CAL2
			Date:						2015-01-15 09:40:15																			Lot:								B32945
			RP1(1) Volt:						516
			RP1(2) Volt:						632.23
											IL-1alpha
			Logistic5p: y = a+((b-a)/(1+((x/c)^d))^f)
		Curve Data:
			R^2 = 0.992555209794968 Sum of Residuals = 644.222573799611 Average Residuals = 107.370428966602 Relative Sum of Squares Absolute = 531524.580653905 Relative Sum of Squares Relative = 0.0133890925654166 Standard Error of the Estimate = 0.115711246494957 Adjusted Coefficient of Multiple Determination = 0.962776048974842 Coefficient a = -0.254584966697184 Coefficient b = 254577392.537912 Coefficien…
		Standards:
		Loc			Standard										Expected Conc					Net MFI							Test Result							Range										% Recovery					%CV of Replicates
		1,C1			Standard1										3.20					0.75							5.641																	176.277
		1,D1			Standard1										3.20					-0.25							0.067																	2.089
		1,E1			Standard2										16.00					3.75							17.604																	110.024
		1,F1			Standard2										16.00					2.75							13.897																	86.856
		1,G1			Standard3										80.00					27.75							87.248																	109.06
		1,H1			Standard3										80.00					29.75							92.345																	115.431
		1,A2			Standard4										400.00					162.25							370.865																	92.716
		1,B2			Standard4										400.00					162.75							371.804																	92.951
		1,C2			Standard5										2,000.00					1165.75							1877.384																	93.869
		1,D2			Standard5										2,000.00					1212.75							1939.444																	96.972
		1,E2			Standard6										10,000.00					9562.75							10608.948																	106.089
		1,F2			Standard6										10,000.00					9688.25							10723.397																	107.234
					Avg Standard1															0.25							2.854																						138.109
					Avg Standard2															3.25							15.75																						16.642
					Avg Standard3															28.75							89.796																						4.013
					Avg Standard4															162.5							371.334																						0.179
					Avg Standard5															1189.25							1908.414																						2.299
					Avg Standard6															9625.5							10666.173																						0.759
	Controls:
																						No control Well records found.
	Samples:
		Loc			Sample ID											Net MFI								Test Result							Range									%CV of Replicates				Unit					Dilution Factor
		1,A1			Background0											-0.25																																	0.00
		1,B1			Background0											0.25																																	0.00
		1,G2			QC1											50.75								142.904																				pg/ml					1.00
		1,H2			QC1											48.75								138.276																				pg/ml					1.00
		1,A3			QC2											366.25								724.277																				pg/ml					1.00
		1,B3			QC2											359.75								713.689																				pg/ml					1.00
		1,C3			TM1											-15.25								<3.2																				pg/ml					1.00
		1,D3			TM2											-13.25								<3.2																				pg/ml					1.00
		1,E3			TM3											-15.75								<3.2																				pg/ml					1.00
		1,F3			TM4											-10.25								<3.2																				pg/ml					1.00
		1,G3			TM5											12.75								46.408																				pg/ml					1.00
		1,H3			TM6											-13.25								<3.2																				pg/ml					1.00
		1,A4			TM7											-11.25								<3.2																				pg/ml					1.00
		1,B4			TM8											-4.25								<3.2																				pg/ml					1.00
		1,C4			TM9											-21.25								<3.2																				pg/ml					1.00
		1,D4			TM10											-8.25								<3.2																				pg/ml					1.00
		1,E4			TM11											-9.25								<3.2																				pg/ml					1.00
		1,F4			TM12											-13.25								<3.2																				pg/ml					1.00
		1,G4			TM13											168.75								383.031																				pg/ml					1.00
		1,H4			TM14											-11.25								<3.2																				pg/ml					1.00
		1,A5			TM15											-2.25								<3.2																				pg/ml					1.00
		1,B5			TM16											-11.25								<3.2																				pg/ml					1.00
		1,C5			TM17											-4.25								<3.2																				pg/ml					1.00
		1,D5			TM18											-6.25								<3.2																				pg/ml					1.00
		1,E5			PS1											7.75								31.127																				pg/ml					1.00
		1,F5			PS2											-6.25								<3.2																				pg/ml					1.00
		1,G5			PS3											-5.25								<3.2																				pg/ml					1.00
		Loc			Sample ID											Net MFI								Test Result							Range									%CV of Replicates				Unit					Dilution Factor
		1,H5			PS4											43.75								126.556																				pg/ml					1.00
		1,A6			PS5											28.75								89.804																				pg/ml					1.00
		1,B6			PS6											69.75								185.446																				pg/ml					1.00
		1,C6			PS7											0.75								5.641																				pg/ml					1.00
		1,D6			PS8											4.75								21.148																				pg/ml					1.00
		1,E6			PS9											20.75								68.858																				pg/ml					1.00
		1,F6			PS10											-18.25								<3.2																				pg/ml					1.00
		1,G6			PS11											-1.25								<3.2																				pg/ml					1.00
		1,H6			PS12											4.75								21.148																				pg/ml					1.00
		1,A7			PS13											52.75								147.5																				pg/ml					1.00
		1,B7			PS14											28.25								88.528																				pg/ml					1.00
		1,C7			PS15											61.75								167.821																				pg/ml					1.00
		1,D7			PS16											45.75								131.271																				pg/ml					1.00
		1,E7			PS17											142.75								333.831																				pg/ml					1.00
		1,F7			NP1											-12.25								<3.2																				pg/ml					1.00
		1,G7			NP2											50.75								142.904																				pg/ml					1.00
		1,H7			NP3											37.75								112.173																				pg/ml					1.00
		1,A8			NP4											15.75								55.053																				pg/ml					1.00
		1,B8			NP5											99.25								247.686																				pg/ml					1.00
		1,C8			NP6											-4.25								<3.2																				pg/ml					1.00
		1,D8			NP7											-16.25								<3.2																				pg/ml					1.00
		1,E8			NP8											-14.25								<3.2																				pg/ml					1.00
		1,F8			NP9											-21.25								<3.2																				pg/ml					1.00
		1,G8			NP10											42.75								124.184																				pg/ml					1.00
		1,H8			NP11											64.25								173.37																				pg/ml					1.00
		1,A9			NP12											70.75								187.624																				pg/ml					1.00
		1,B9			NP13											18.75								63.415																				pg/ml					1.00
		1,C9			NP14											-5.25								<3.2																				pg/ml					1.00
		Loc			Sample ID											Net MFI								Test Result							Range									%CV of Replicates				Unit					Dilution Factor
		1,D9			NP15											-10.25								<3.2																				pg/ml					1.00
		1,E9			NP16											79.25								205.921																				pg/ml					1.00
		1,F9			NP17											56.75								156.601																				pg/ml					1.00
		1,G9			NP18											91.75								232.216																				pg/ml					1.00
		1,H9			NP19											-20.25								<3.2																				pg/ml					1.00
		1,A10			NP20											74.75								196.28																				pg/ml					1.00
		1,B10			NP21											36.75								109.738																				pg/ml					1.00
		1,C10			NP22											32.25								98.632																				pg/ml					1.00
		1,D10			NP23											7.75								31.127																				pg/ml					1.00
		1,E10			NP24											11.75								43.451																				pg/ml					1.00
		1,F10			NP25											5.75								24.569																				pg/ml					1.00
		1,G10			NP26											-19.25								<3.2																				pg/ml					1.00
		1,H10			NP27											302.75								619.3																				pg/ml					1.00
		1,A11			NP28											120.75								290.952																				pg/ml					1.00
		1,B11			NP29											-11.25								<3.2																				pg/ml					1.00
		1,C11			NP30											19.25								64.785																				pg/ml					1.00
		1,D11			NP31											85.75								219.679																				pg/ml					1.00
		1,E11			NP32											9.75								37.399																				pg/ml					1.00
		1,F11			NP33											127.75								304.735																				pg/ml					1.00
		1,G11			NP34											41.75								121.803																				pg/ml					1.00
		1,H11			NP35											-19.25								<3.2																				pg/ml					1.00
		1,A12			NP36											1.75								9.96																				pg/ml					1.00
		1,B12			NP37											15.25								53.634																				pg/ml					1.00
		1,C12			NP38											5.75								24.569																				pg/ml					1.00
		1,D12			NP39											-14.25								<3.2																				pg/ml					1.00
		1,E12			NP40											0.75								5.641																				pg/ml					1.00
		1,F12			NP41											31.75								97.381																				pg/ml					1.00
		1,G12			NP42											-9.25								<3.2																				pg/ml					1.00
		Loc			Sample ID											Net MFI								Test Result							Range									%CV of Replicates				Unit					Dilution Factor
		1,H12			NP43											46.75								133.615																				pg/ml					1.00
					Avg Background0											0								NA																NaN
																															Page 8 of 8

## Sheet: IL-1b
	Luminex
	Data Interpretation Report																																						2015-01-15							15:06:54
		Batch Name:								YD-IPDk
		Protocol Name:								IPDk Sera
		Protocol Version:								2
		Test Name:								IL-1beta
		Formula:								Y=a + ((b-a) / (1 + ((x / c) ^ d)) ^ f) (Logistic 5P Weighted)
			Most recent calibration and control results:
		MagCAL1:				Passed							2015-01-15 09:39:08
		CAL2:				Passed							2015-01-15 09:40:08
		MagCON1:				Passed							2015-01-15 09:41:05
		CON2:				Passed							2015-01-15 09:41:51
		Calibration results used for batch:
		MagCAL1
			Date:						2015-01-15 09:39:15																			Lot:								B32887
			DD Volt:						60.4																			DD Temp:								23.52
			CL1 Volt:						116.51																			CL1 Temp:								23.31
			CL2 Volt:						117.01																			CL2 Temp:								23.31
		CAL2
			Date:						2015-01-15 09:40:15																			Lot:								B32945
			RP1(1) Volt:						516
			RP1(2) Volt:						632.23
											IL-1beta
			Logistic5p: y = a+((b-a)/(1+((x/c)^d))^f)
		Curve Data:
			R^2 = 0.999768966728312 Sum of Residuals = 11.0425457095996 Average Residuals = 1.84042428493326 Relative Sum of Squares Absolute = 2120.95196758382 Relative Sum of Squares Relative = 2.65802706010019 Standard Error of the Estimate = 1.63034568730076 Adjusted Coefficient of Multiple Determination = 0.99884483364156 Coefficient a = -2.15300577255845 Coefficient b = 16889.0604797119 Coefficient c =…
		Standards:
		Loc			Standard										Expected Conc					Net MFI							Test Result							Range										% Recovery					%CV of Replicates
		1,C1			Standard1										3.20					21							3.194																	99.816
		1,D1			Standard1										3.20					21							3.194																	99.816
		1,E1			Standard2										16.00					113							16.618																	103.86
		1,F1			Standard2										16.00					108							15.876																	99.226
		1,G1			Standard3										80.00					508							76.799																	95.999
		1,H1			Standard3										80.00					524							79.279																	99.099
		1,A2			Standard4										400.00					2446.5							389.753																	97.438
		1,B2			Standard4										400.00					2641.5							422.547																	105.637
		1,C2			Standard5										2,000.00					9726.5							1980.471																	99.024
		1,D2			Standard5										2,000.00					9802							2004.591																	100.23
		1,E2			Standard6										10,000.00					16190							10217.976																	102.18
		1,F2			Standard6										10,000.00					16153.5							9929.991																	99.3
					Avg Standard1															21							3.194																						0
					Avg Standard2															110.5							16.247																						3.227
					Avg Standard3															516							78.039																						2.247
					Avg Standard4															2544							406.15																						5.709
					Avg Standard5															9764.25							1992.531																						0.856
					Avg Standard6															16171.75							10073.983																						2.021
	Controls:
																						No control Well records found.
	Samples:
		Loc			Sample ID											Net MFI								Test Result							Range									%CV of Replicates				Unit					Dilution Factor
		1,A1			Background0											0																																	0.00
		1,B1			Background0											0																																	0.00
		1,G2			QC1											773								118.155																				pg/ml					1.00
		1,H2			QC1											757								115.642																				pg/ml					1.00
		1,A3			QC2											3744								613.383																				pg/ml					1.00
		1,B3			QC2											3954.5								651.007																				pg/ml					1.00
		1,C3			TM1											-6								<3.2																				pg/ml					1.00
		1,D3			TM2											-8								<3.2																				pg/ml					1.00
		1,E3			TM3											-11								<3.2																				pg/ml					1.00
		1,F3			TM4											-8								<3.2																				pg/ml					1.00
		1,G3			TM5											11								1.786																				pg/ml					1.00
		1,H3			TM6											-2								0.018																				pg/ml					1.00
		1,A4			TM7											-11								<3.2																				pg/ml					1.00
		1,B4			TM8											15								2.347																				pg/ml					1.00
		1,C4			TM9											-10								<3.2																				pg/ml					1.00
		1,D4			TM10											-6								<3.2																				pg/ml					1.00
		1,E4			TM11											-5								<3.2																				pg/ml					1.00
		1,F4			TM12											2								0.546																				pg/ml					1.00
		1,G4			TM13											10								1.647																				pg/ml					1.00
		1,H4			TM14											-10								<3.2																				pg/ml					1.00
		1,A5			TM15											-4								<3.2																				pg/ml					1.00
		1,B5			TM16											-10								<3.2																				pg/ml					1.00
		1,C5			TM17											7								1.23																				pg/ml					1.00
		1,D5			TM18											-3								<3.2																				pg/ml					1.00
		1,E5			PS1											-6								<3.2																				pg/ml					1.00
		1,F5			PS2											-10								<3.2																				pg/ml					1.00
		1,G5			PS3											-7								<3.2																				pg/ml					1.00
		Loc			Sample ID											Net MFI								Test Result							Range									%CV of Replicates				Unit					Dilution Factor
		1,H5			PS4											-5								<3.2																				pg/ml					1.00
		1,A6			PS5											-4								<3.2																				pg/ml					1.00
		1,B6			PS6											-1								0.146																				pg/ml					1.00
		1,C6			PS7											-10								<3.2																				pg/ml					1.00
		1,D6			PS8											1								0.411																				pg/ml					1.00
		1,E6			PS9											-3								<3.2																				pg/ml					1.00
		1,F6			PS10											-8								<3.2																				pg/ml					1.00
		1,G6			PS11											1								0.411																				pg/ml					1.00
		1,H6			PS12											-8								<3.2																				pg/ml					1.00
		1,A7			PS13											7								1.23																				pg/ml					1.00
		1,B7			PS14											1								0.411																				pg/ml					1.00
		1,C7			PS15											-4								<3.2																				pg/ml					1.00
		1,D7			PS16											10								1.647																				pg/ml					1.00
		1,E7			PS17											4								0.818																				pg/ml					1.00
		1,F7			NP1											-11								<3.2																				pg/ml					1.00
		1,G7			NP2											2								0.546																				pg/ml					1.00
		1,H7			NP3											-9								<3.2																				pg/ml					1.00
		1,A8			NP4											-10								<3.2																				pg/ml					1.00
		1,B8			NP5											1								0.411																				pg/ml					1.00
		1,C8			NP6											7								1.23																				pg/ml					1.00
		1,D8			NP7											4								0.818																				pg/ml					1.00
		1,E8			NP8											-7								<3.2																				pg/ml					1.00
		1,F8			NP9											-6.5								<3.2																				pg/ml					1.00
		1,G8			NP10											-6								<3.2																				pg/ml					1.00
		1,H8			NP11											6								1.092																				pg/ml					1.00
		1,A9			NP12											12								1.926																				pg/ml					1.00
		1,B9			NP13											5								0.955																				pg/ml					1.00
		1,C9			NP14											2								0.546																				pg/ml					1.00
		Loc			Sample ID											Net MFI								Test Result							Range									%CV of Replicates				Unit					Dilution Factor
		1,D9			NP15											-7								<3.2																				pg/ml					1.00
		1,E9			NP16											3								0.682																				pg/ml					1.00
		1,F9			NP17											6								1.092																				pg/ml					1.00
		1,G9			NP18											25								3.763																				pg/ml					1.00
		1,H9			NP19											-13								<3.2																				pg/ml					1.00
		1,A10			NP20											-2								0.018																				pg/ml					1.00
		1,B10			NP21											-7								<3.2																				pg/ml					1.00
		1,C10			NP22											-12								<3.2																				pg/ml					1.00
		1,D10			NP23											-9.5								<3.2																				pg/ml					1.00
		1,E10			NP24											-2								0.018																				pg/ml					1.00
		1,F10			NP25											213								31.6																				pg/ml					1.00
		1,G10			NP26											-11								<3.2																				pg/ml					1.00
		1,H10			NP27											2457								391.512																				pg/ml					1.00
		1,A11			NP28											629								95.611																				pg/ml					1.00
		1,B11			NP29											-12								<3.2																				pg/ml					1.00
		1,C11			NP30											20								3.052																				pg/ml					1.00
		1,D11			NP31											-5								<3.2																				pg/ml					1.00
		1,E11			NP32											-8								<3.2																				pg/ml					1.00
		1,F11			NP33											-3								<3.2																				pg/ml					1.00
		1,G11			NP34											95								13.953																				pg/ml					1.00
		1,H11			NP35											-8								<3.2																				pg/ml					1.00
		1,A12			NP36											8								1.369																				pg/ml					1.00
		1,B12			NP37											-1								0.146																				pg/ml					1.00
		1,C12			NP38											4								0.818																				pg/ml					1.00
		1,D12			NP39											-7								<3.2																				pg/ml					1.00
		1,E12			NP40											-9								<3.2																				pg/ml					1.00
		1,F12			NP41											-3								<3.2																				pg/ml					1.00
		1,G12			NP42											-14								<3.2																				pg/ml					1.00
		Loc			Sample ID											Net MFI								Test Result							Range									%CV of Replicates				Unit					Dilution Factor
		1,H12			NP43											-6								<3.2																				pg/ml					1.00
					Avg Background0											0								NA																NaN
																															Page 8 of 8

## Sheet: IL-1RA
	Luminex
	Data Interpretation Report																																						2015-01-15							15:07:08
		Batch Name:								YD-IPDk
		Protocol Name:								IPDk Sera
		Protocol Version:								2
		Test Name:								IL-1RA
		Formula:								Y=a + ((b-a) / (1 + ((x / c) ^ d)) ^ f) (Logistic 5P Weighted)
			Most recent calibration and control results:
		MagCAL1:				Passed							2015-01-15 09:39:08
		CAL2:				Passed							2015-01-15 09:40:08
		MagCON1:				Passed							2015-01-15 09:41:05
		CON2:				Passed							2015-01-15 09:41:51
		Calibration results used for batch:
		MagCAL1
			Date:						2015-01-15 09:39:15																			Lot:								B32887
			DD Volt:						60.4																			DD Temp:								23.52
			CL1 Volt:						116.51																			CL1 Temp:								23.31
			CL2 Volt:						117.01																			CL2 Temp:								23.31
		CAL2
			Date:						2015-01-15 09:40:15																			Lot:								B32945
			RP1(1) Volt:						516
			RP1(2) Volt:						632.23
											IL-1RA
			Logistic5p: y = a+((b-a)/(1+((x/c)^d))^f)
		Curve Data:
			R^2 = 0.994704424256176 Sum of Residuals = 10.7564591452853 Average Residuals = 1.79274319088088 Relative Sum of Squares Absolute = 141.609392010062 Relative Sum of Squares Relative = 0.0416588925495773 Standard Error of the Estimate = 0.204105101723542 Adjusted Coefficient of Multiple Determination = 0.973522121280881 Coefficient a = -1.37605012437059 Coefficient b = 682.714010152196 Coefficient…
		Standards:
		Loc			Standard										Expected Conc					Net MFI							Test Result							Range										% Recovery					%CV of Replicates
		1,C1			Standard1										3.20					-0.5							3.171																	99.098
		1,D1			Standard1										3.20					-0.5							3.171																	99.098
		1,E1			Standard2										16.00					2.5							17.216																	107.602
		1,F1			Standard2										16.00					2.5							17.216																	107.602
		1,G1			Standard3										80.00					11.5							67.464																	84.33
		1,H1			Standard3										80.00					12.5							73.456																	91.82
		1,A2			Standard4										400.00					58.5							387.598																	96.899
		1,B2			Standard4										400.00					62.5							417.187																	104.297
		1,C2			Standard5										2,000.00					278							2235.499																	111.775
		1,D2			Standard5										2,000.00					249.5							1977.898																	98.895
		1,E2			Standard6										10,000.00					686.5							>10000																	NA
		1,F2			Standard6										10,000.00					675.5							8289.981																	82.9
					Avg Standard1															-0.5							3.171																						0
					Avg Standard2															2.5							17.216																						0
					Avg Standard3															12							70.46																						6.013
					Avg Standard4															60.5							402.392																						5.2
					Avg Standard5															263.75							2106.699																						8.646
					Avg Standard6															681							NA																						NaN
	Controls:
																						No control Well records found.
	Samples:
		Loc			Sample ID											Net MFI								Test Result							Range									%CV of Replicates				Unit					Dilution Factor
		1,A1			Background0											-0.5																																	0.00
		1,B1			Background0											0.5																																	0.00
		1,G2			QC1											17.5								104.246																				pg/ml					1.00
		1,H2			QC1											15								88.689																				pg/ml					1.00
		1,A3			QC2											88.5								615.236																				pg/ml					1.00
		1,B3			QC2											85.5								591.929																				pg/ml					1.00
		1,C3			TM1											0.5								7.541																				pg/ml					1.00
		1,D3			TM2											1.5								12.261																				pg/ml					1.00
		1,E3			TM3											-0.5								3.171																				pg/ml					1.00
		1,F3			TM4											1.5								12.261																				pg/ml					1.00
		1,G3			TM5											1.5								12.261																				pg/ml					1.00
		1,H3			TM6											-1.5								<3.2																				pg/ml					1.00
		1,A4			TM7											-0.5								3.171																				pg/ml					1.00
		1,B4			TM8											-0.5								3.171																				pg/ml					1.00
		1,C4			TM9											0.5								7.541																				pg/ml					1.00
		1,D4			TM10											1.5								12.261																				pg/ml					1.00
		1,E4			TM11											6.5								38.568																				pg/ml					1.00
		1,F4			TM12											10.5								61.536																				pg/ml					1.00
		1,G4			TM13											14.5								85.615																				pg/ml					1.00
		1,H4			TM14											0.5								7.541																				pg/ml					1.00
		1,A5			TM15											12.5								73.456																				pg/ml					1.00
		1,B5			TM16											-1.5								<3.2																				pg/ml					1.00
		1,C5			TM17											18.5								110.551																				pg/ml					1.00
		1,D5			TM18											10.5								61.536																				pg/ml					1.00
		1,E5			PS1											6.5								38.568																				pg/ml					1.00
		1,F5			PS2											0.5								7.541																				pg/ml					1.00
		1,G5			PS3											0.5								7.541																				pg/ml					1.00
		Loc			Sample ID											Net MFI								Test Result							Range									%CV of Replicates				Unit					Dilution Factor
		1,H5			PS4											8.5								49.891																				pg/ml					1.00
		1,A6			PS5											7.5								44.186																				pg/ml					1.00
		1,B6			PS6											15.5								91.775																				pg/ml					1.00
		1,C6			PS7											2.5								17.216																				pg/ml					1.00
		1,D6			PS8											18.5								110.551																				pg/ml					1.00
		1,E6			PS9											21.5								129.722																				pg/ml					1.00
		1,F6			PS10											2.5								17.216																				pg/ml					1.00
		1,G6			PS11											2.5								17.216																				pg/ml					1.00
		1,H6			PS12											8.5								49.891																				pg/ml					1.00
		1,A7			PS13											51.5								336.479																				pg/ml					1.00
		1,B7			PS14											6.5								38.568																				pg/ml					1.00
		1,C7			PS15											16.5								97.987																				pg/ml					1.00
		1,D7			PS16											27.5								169.079																				pg/ml					1.00
		1,E7			PS17											15.5								91.775																				pg/ml					1.00
		1,F7			NP1											11.5								67.464																				pg/ml					1.00
		1,G7			NP2											17.5								104.246																				pg/ml					1.00
		1,H7			NP3											7.5								44.186																				pg/ml					1.00
		1,A8			NP4											4.5								27.638																				pg/ml					1.00
		1,B8			NP5											111.5								797.288																				pg/ml					1.00
		1,C8			NP6											19.5								116.9																				pg/ml					1.00
		1,D8			NP7											13								76.474																				pg/ml					1.00
		1,E8			NP8											5.5								33.048																				pg/ml					1.00
		1,F8			NP9											11.5								67.464																				pg/ml					1.00
		1,G8			NP10											10.5								61.536																				pg/ml					1.00
		1,H8			NP11											101.5								717.439																				pg/ml					1.00
		1,A9			NP12											52.5								343.728																				pg/ml					1.00
		1,B9			NP13											22.5								136.192																				pg/ml					1.00
		1,C9			NP14											20.5								123.291																				pg/ml					1.00
		Loc			Sample ID											Net MFI								Test Result							Range									%CV of Replicates				Unit					Dilution Factor
		1,D9			NP15											4.5								27.638																				pg/ml					1.00
		1,E9			NP16											27.5								169.079																				pg/ml					1.00
		1,F9			NP17											22.5								136.192																				pg/ml					1.00
		1,G9			NP18											79.5								545.648																				pg/ml					1.00
		1,H9			NP19											40.5								258.064																				pg/ml					1.00
		1,A10			NP20											21.5								129.722																				pg/ml					1.00
		1,B10			NP21											9.5								55.677																				pg/ml					1.00
		1,C10			NP22											3								19.764																				pg/ml					1.00
		1,D10			NP23											3.5								22.353																				pg/ml					1.00
		1,E10			NP24											27.5								169.079																				pg/ml					1.00
		1,F10			NP25											15.5								91.775																				pg/ml					1.00
		1,G10			NP26											0.5								7.541																				pg/ml					1.00
		1,H10			NP27											2628.5								>10000																				pg/ml					1.00
		1,A11			NP28											874.5								>10000																				pg/ml					1.00
		1,B11			NP29											-0.5								3.171																				pg/ml					1.00
		1,C11			NP30											30.5								189.2																				pg/ml					1.00
		1,D11			NP31											22								132.952																				pg/ml					1.00
		1,E11			NP32											6.5								38.568																				pg/ml					1.00
		1,F11			NP33											36.5								230.212																				pg/ml					1.00
		1,G11			NP34											45.5								293.395																				pg/ml					1.00
		1,H11			NP35											11.5								67.464																				pg/ml					1.00
		1,A12			NP36											21.5								129.722																				pg/ml					1.00
		1,B12			NP37											29.5								182.463																				pg/ml					1.00
		1,C12			NP38											17.5								104.246																				pg/ml					1.00
		1,D12			NP39											5.5								33.048																				pg/ml					1.00
		1,E12			NP40											4.5								27.638																				pg/ml					1.00
		1,F12			NP41											41.5								265.086																				pg/ml					1.00
		1,G12			NP42											-5								<3.2																				pg/ml					1.00
		Loc			Sample ID											Net MFI								Test Result							Range									%CV of Replicates				Unit					Dilution Factor
		1,H12			NP43											16.5								97.987																				pg/ml					1.00
					Avg Background0											0								NA																NaN
																															Page 8 of 8

## Sheet: IL-2
	Luminex
	Data Interpretation Report																																						2015-01-15							15:07:21
		Batch Name:								YD-IPDk
		Protocol Name:								IPDk Sera
		Protocol Version:								2
		Test Name:								IL-2
		Formula:								Y=a + ((b-a) / (1 + ((x / c) ^ d)) ^ f) (Logistic 5P Weighted)
			Most recent calibration and control results:
		MagCAL1:				Passed							2015-01-15 09:39:08
		CAL2:				Passed							2015-01-15 09:40:08
		MagCON1:				Passed							2015-01-15 09:41:05
		CON2:				Passed							2015-01-15 09:41:51
		Calibration results used for batch:
		MagCAL1
			Date:						2015-01-15 09:39:15																			Lot:								B32887
			DD Volt:						60.4																			DD Temp:								23.52
			CL1 Volt:						116.51																			CL1 Temp:								23.31
			CL2 Volt:						117.01																			CL2 Temp:								23.31
		CAL2
			Date:						2015-01-15 09:40:15																			Lot:								B32945
			RP1(1) Volt:						516
			RP1(2) Volt:						632.23
											IL-2
			Logistic5p: y = a+((b-a)/(1+((x/c)^d))^f)
		Curve Data:
			R^2 = 0.999699424505779 Sum of Residuals = 4.48682488791635 Average Residuals = 0.747804147986058 Relative Sum of Squares Absolute = 4268.78600699415 Relative Sum of Squares Relative = 3.50221513480344 Standard Error of the Estimate = 1.8714206194235 Adjusted Coefficient of Multiple Determination = 0.998497122528897 Coefficient a = 2.9485759260728 Coefficient b = 26244.7561955544 Coefficient c = …
		Standards:
		Loc			Standard										Expected Conc					Net MFI							Test Result							Range										% Recovery					%CV of Replicates
		1,C1			Standard1										3.20					23							3.453																	107.898
		1,D1			Standard1										3.20					20							2.93																	91.564
		1,E1			Standard2										16.00					99							16.885																	105.529
		1,F1			Standard2										16.00					92							15.638																	97.737
		1,G1			Standard3										80.00					423.5							75.647																	94.559
		1,H1			Standard3										80.00					448							80.141																	100.176
		1,A2			Standard4										400.00					2195							416.638																	104.16
		1,B2			Standard4										400.00					2112							399.921																	99.98
		1,C2			Standard5										2,000.00					8361							1952.751																	97.638
		1,D2			Standard5										2,000.00					8570							2018.704																	100.935
		1,E2			Standard6										10,000.00					19581							9771.792																	97.718
		1,F2			Standard6										10,000.00					19888.5							10305.267																	103.053
					Avg Standard1															21.5							3.191																						11.581
					Avg Standard2															95.5							16.261																						5.421
					Avg Standard3															435.75							77.894																						4.079
					Avg Standard4															2153.5							408.28																						2.895
					Avg Standard5															8465.5							1985.727																						2.349
					Avg Standard6															19734.75							10038.53																						3.758
	Controls:
																						No control Well records found.
	Samples:
		Loc			Sample ID											Net MFI								Test Result							Range									%CV of Replicates				Unit					Dilution Factor
		1,A1			Background0											0																																	0.00
		1,B1			Background0											0																																	0.00
		1,G2			QC1											648								117.07																				pg/ml					1.00
		1,H2			QC1											629								113.544																				pg/ml					1.00
		1,A3			QC2											3221								629.985																				pg/ml					1.00
		1,B3			QC2											3292								645.232																				pg/ml					1.00
		1,C3			TM1											-11								<3.2																				pg/ml					1.00
		1,D3			TM2											-10								<3.2																				pg/ml					1.00
		1,E3			TM3											-11								<3.2																				pg/ml					1.00
		1,F3			TM4											-8								<3.2																				pg/ml					1.00
		1,G3			TM5											9								1.026																				pg/ml					1.00
		1,H3			TM6											-6								<3.2																				pg/ml					1.00
		1,A4			TM7											-11								<3.2																				pg/ml					1.00
		1,B4			TM8											-11								<3.2																				pg/ml					1.00
		1,C4			TM9											-10								<3.2																				pg/ml					1.00
		1,D4			TM10											-6								<3.2																				pg/ml					1.00
		1,E4			TM11											-7.5								<3.2																				pg/ml					1.00
		1,F4			TM12											1								<3.2																				pg/ml					1.00
		1,G4			TM13											1								<3.2																				pg/ml					1.00
		1,H4			TM14											-9								<3.2																				pg/ml					1.00
		1,A5			TM15											2								<3.2																				pg/ml					1.00
		1,B5			TM16											-11								<3.2																				pg/ml					1.00
		1,C5			TM17											4								0.174																				pg/ml					1.00
		1,D5			TM18											-6								<3.2																				pg/ml					1.00
		1,E5			PS1											-9								<3.2																				pg/ml					1.00
		1,F5			PS2											-11								<3.2																				pg/ml					1.00
		1,G5			PS3											-9								<3.2																				pg/ml					1.00
		Loc			Sample ID											Net MFI								Test Result							Range									%CV of Replicates				Unit					Dilution Factor
		1,H5			PS4											-3								<3.2																				pg/ml					1.00
		1,A6			PS5											-3								<3.2																				pg/ml					1.00
		1,B6			PS6											-1								<3.2																				pg/ml					1.00
		1,C6			PS7											-9								<3.2																				pg/ml					1.00
		1,D6			PS8											-8								<3.2																				pg/ml					1.00
		1,E6			PS9											-7								<3.2																				pg/ml					1.00
		1,F6			PS10											-10								<3.2																				pg/ml					1.00
		1,G6			PS11											-3								<3.2																				pg/ml					1.00
		1,H6			PS12											-8								<3.2																				pg/ml					1.00
		1,A7			PS13											1.5								<3.2																				pg/ml					1.00
		1,B7			PS14											-2								<3.2																				pg/ml					1.00
		1,C7			PS15											-4								<3.2																				pg/ml					1.00
		1,D7			PS16											8								0.855																				pg/ml					1.00
		1,E7			PS17											-1								<3.2																				pg/ml					1.00
		1,F7			NP1											15								2.062																				pg/ml					1.00
		1,G7			NP2											2								<3.2																				pg/ml					1.00
		1,H7			NP3											-8								<3.2																				pg/ml					1.00
		1,A8			NP4											-9								<3.2																				pg/ml					1.00
		1,B8			NP5											-10								<3.2																				pg/ml					1.00
		1,C8			NP6											-5								<3.2																				pg/ml					1.00
		1,D8			NP7											-7								<3.2																				pg/ml					1.00
		1,E8			NP8											-7								<3.2																				pg/ml					1.00
		1,F8			NP9											-4								<3.2																				pg/ml					1.00
		1,G8			NP10											-5								<3.2																				pg/ml					1.00
		1,H8			NP11											2								<3.2																				pg/ml					1.00
		1,A9			NP12											2								<3.2																				pg/ml					1.00
		1,B9			NP13											5								0.343																				pg/ml					1.00
		1,C9			NP14											-3								<3.2																				pg/ml					1.00
		Loc			Sample ID											Net MFI								Test Result							Range									%CV of Replicates				Unit					Dilution Factor
		1,D9			NP15											-9								<3.2																				pg/ml					1.00
		1,E9			NP16											4								0.174																				pg/ml					1.00
		1,F9			NP17											10								1.198																				pg/ml					1.00
		1,G9			NP18											21								3.104																				pg/ml					1.00
		1,H9			NP19											-14								<3.2																				pg/ml					1.00
		1,A10			NP20											-4								<3.2																				pg/ml					1.00
		1,B10			NP21											-5								<3.2																				pg/ml					1.00
		1,C10			NP22											-12								<3.2																				pg/ml					1.00
		1,D10			NP23											-9								<3.2																				pg/ml					1.00
		1,E10			NP24											-7								<3.2																				pg/ml					1.00
		1,F10			NP25											-11								<3.2																				pg/ml					1.00
		1,G10			NP26											-10								<3.2																				pg/ml					1.00
		1,H10			NP27											2603.5								500.066																				pg/ml					1.00
		1,A11			NP28											711								128.79																				pg/ml					1.00
		1,B11			NP29											-8								<3.2																				pg/ml					1.00
		1,C11			NP30											16								2.235																				pg/ml					1.00
		1,D11			NP31											-4								<3.2																				pg/ml					1.00
		1,E11			NP32											-7								<3.2																				pg/ml					1.00
		1,F11			NP33											-5								<3.2																				pg/ml					1.00
		1,G11			NP34											22.5								3.366																				pg/ml					1.00
		1,H11			NP35											-13								<3.2																				pg/ml					1.00
		1,A12			NP36											3								0.008																				pg/ml					1.00
		1,B12			NP37											-3								<3.2																				pg/ml					1.00
		1,C12			NP38											3								0.008																				pg/ml					1.00
		1,D12			NP39											-9								<3.2																				pg/ml					1.00
		1,E12			NP40											-8								<3.2																				pg/ml					1.00
		1,F12			NP41											-4								<3.2																				pg/ml					1.00
		1,G12			NP42											-14								<3.2																				pg/ml					1.00
		Loc			Sample ID											Net MFI								Test Result							Range									%CV of Replicates				Unit					Dilution Factor
		1,H12			NP43											-9								<3.2																				pg/ml					1.00
					Avg Background0											0								NA																NaN
																															Page 8 of 8

[truncated: 19 more sheets: IL-3, IL-4, IL-5, IL-6, IL-7, IL-8, IL-10, IL-12p40, IL-12p70, IL-13, IL-15, IL-17a, IP-10, MCP-1, MIP-1a, MIP-1b, TNFa, TNFb, VEGF]
