# Supplementary material for: Cytokine response during non-cerebral and cerebral malaria: evidence of a failure to control inflammation as a cause of death in African adults
Source: PeerJ. 2016 May 2;4:e1965. doi: 10.7717/peerj.1965 (PMC4860323; doi:10.7717/peerj.1965)
Supplement: Supplemental Information 2 [file peerj-04-1965-s003.xlsx]

## Sheet: K-Wallis No Children
GET FILE='C:\Users\user\Desktop\YD FROM NOV-28\Hp and malaria\Malaria manuscripts\Writing cytokine paper\PeerJ submission\Revision Pee rJ\Stats for revision\SPSS Cytokine Palu-March 2016.sav'. USE ALL. COMPUTE filter_$=(Age > 14). VARIABLE LABEL filter_$ 'Age > 14 (FILTER)'. VALUE LABELS filter_$ 0 'Not Selected' 1 'Selected'. FORMAT filter_$ (f1.0). FILTER BY filter_$. EXECUTE. NPAR TESTS /K-W=E…
NPar Tests
Notes
Output Created		09-Mar-2016 20:11:49
Comments
Input	Data	C:\Users\user\Desktop\YD FROM NOV-28\Hp and malaria\Malaria manuscripts\Writing cytokine paper\PeerJ submission\Revision PeerJ\Stats for revision\SPSS Cytokine Palu-March 2016.sav
	Active Dataset	DataSet1
	Filter	Age > 14 (FILTER)
	Weight	<none>
	Split File	<none>
	N of Rows in Working Data File	56
Missing Value Handling	Definition of Missing	User-defined missing values are treated as missing.
	Cases Used	Statistics for each test are based on all cases with valid data for the variable(s) used in that test.
Syntax		NPAR TESTS /K-W=EGF Eotaxin GCSF GMCSF IFNa2 IFNg IL10 IL12p40 IL12p70 IL15 IL17A IL1RA IL1a IL1b IL5 IL6 IL7 IL8 IP10 MCP1 MIP1a MIP1b TNFa VEGF BY Status(1 3) /MISSING ANALYSIS.
Resources	Processor Time	0:00:00.062
	Elapsed Time	0:00:00.125
	Number of Cases Alloweda	26214
a. Based on availability of workspace memory.
[DataSet1] C:\Users\user\Desktop\YD FROM NOV-28\Hp and malaria\Malaria manuscripts\Writing cytokine paper\PeerJ submission\Revision PeerJ\Stats for revision\SPSS Cytokine Palu-March 2016.sav
Kruskal-Wallis Test
						Benjamini-Hochberg adjustment (biomarkers that significantly differ are shown in bold)
Ranks						P	i	q	m	crit	test
	Malaria status	N	Mean Rank			0.869	24	0.05	24	0.05	0
EGF	Control	18	28.9444			0.788	23	0.05	24	0.047917	0
	Non-Cerebral Malaria	11	30.4091			0.58	22	0.05	24	0.045833	0
	Cerebral Malaria	27	27.4259			0.41	21	0.05	24	0.04375	0
	Total	56				0.32	20	0.05	24	0.041667	0
Eotaxin	Control	18	29.3056			0.104	19	0.05	24	0.039583	0
	Non-Cerebral Malaria	11	22.6818			0.06	18	0.05	24	0.0375	0
	Cerebral Malaria	27	30.3333		IL-17A	0.032	17	0.05	24	0.035417	1
	Total	56			IL-12p70	0.017	16	0.05	24	0.033333	1
G-CSF	Control	18	18.4167		IFNg	0.013	15	0.05	24	0.03125	1
	Non-Cerebral Malaria	11	24		MIP-1a	0.011	14	0.05	24	0.029167	1
	Cerebral Malaria	27	37.0556		IL-5	0.011	13	0.05	24	0.027083	1
	Total	56			GM-CSF	0.004	12	0.05	24	0.025	1
GM-CSF	Control	18	18.9722		G-CSF	0.001	11	0.05	24	0.022917	1
	Non-Cerebral Malaria	11	26.8182		IL-1a	0.001	10	0.05	24	0.020833	1
	Cerebral Malaria	27	35.537		MCP-1	0	9	0.05	24	0.01875	1
	Total	56			IL-15	0	8	0.05	24	0.016667	1
IFN-alpha2	Control	18	21		IL-1RA	0	7	0.05	24	0.014583	1
	Non-Cerebral Malaria	11	32.3182		MIP-1b	0	6	0.05	24	0.0125	1
	Cerebral Malaria	27	31.9444		IP-10	0	5	0.05	24	0.010417	1
	Total	56			IL-8	0	4	0.05	24	0.008333	1
IFN-gamma	Control	18	19.2778		IL-10	0	3	0.05	24	0.00625	1
	Non-Cerebral Malaria	11	34		TNFa	0	2	0.05	24	0.004167	1
	Cerebral Malaria	27	32.4074		IL-6	0	1	0.05	24	0.002083	1
	Total	56
IL-10	Control	18	10.6667
	Non-Cerebral Malaria	11	31.0909
	Cerebral Malaria	27	39.3333
	Total	56
IL-12p40	Control	18	27.4722
	Non-Cerebral Malaria	11	28.5455
	Cerebral Malaria	27	29.1667
	Total	56
IL-12p70	Control	18	20.7778
	Non-Cerebral Malaria	11	38.1364
	Cerebral Malaria	27	29.7222
	Total	56
IL-15	Control	18	18.1111
	Non-Cerebral Malaria	11	25.9091
	Cerebral Malaria	27	36.4815
	Total	56
IL-17A	Control	18	20.6389
	Non-Cerebral Malaria	11	28.8182
	Cerebral Malaria	27	33.6111
	Total	56
IL-1RA	Control	18	17.0556
	Non-Cerebral Malaria	11	24.0909
	Cerebral Malaria	27	37.9259
	Total	56
IL-1alpha	Control	18	16.8889
	Non-Cerebral Malaria	11	32.1818
	Cerebral Malaria	27	34.7407
	Total	56
IL-1beta	Control	18	25.8889
	Non-Cerebral Malaria	11	27.7727
	Cerebral Malaria	27	30.537
	Total	56
IL-5	Control	18	29.5
	Non-Cerebral Malaria	11	36.2727
	Cerebral Malaria	27	24.6667
	Total	56
IL-6	Control	18	10.1667
	Non-Cerebral Malaria	11	27.9545
	Cerebral Malaria	27	40.9444
	Total	56
IL-7	Control	18	24.8056
	Non-Cerebral Malaria	11	26.9545
	Cerebral Malaria	27	31.5926
	Total	56
IL-8	Control	18	12.5
	Non-Cerebral Malaria	11	24.2727
	Cerebral Malaria	27	40.8889
	Total	56
IP-10	Control	18	11.5
	Non-Cerebral Malaria	11	33.1818
	Cerebral Malaria	27	37.9259
	Total	56
MCP-1	Control	18	18.1111
	Non-Cerebral Malaria	11	24.4545
	Cerebral Malaria	27	37.0741
	Total	56
MIP-1alpha	Control	18	19.9722
	Non-Cerebral Malaria	11	28.0909
	Cerebral Malaria	27	34.3519
	Total	56
MIP-1beta	Control	18	14.1944
	Non-Cerebral Malaria	11	34.7273
	Cerebral Malaria	27	35.5
	Total	56
TNFalpha	Control	18	9.86111
	Non-Cerebral Malaria	11	31.2727
	Cerebral Malaria	27	39.7963
	Total	56
VEGF	Control	18	22.4722
	Non-Cerebral Malaria	11	27.4545
	Cerebral Malaria	27	32.9444
	Total	56
Test Statisticsa,b
	EGF	Eotaxin	G-CSF	GM-CSF	IFN-alpha2	IFN-gamma	IL-10	IL-12p40	IL-12p70	IL-15	IL-17A	IL-1RA	IL-1alpha	IL-1beta	IL-5	IL-6	IL-7	IL-8	IP-10	MCP-1	MIP-1alpha	MIP-1beta	TNFalpha	VEGF
Chi-Square	0.281703	1.785	15.151	11.2968	5.632	8.61657	35.0775	0.476886	8.13204	17.6617	6.91103	18.7128	15.152	1.08966	9.10119	39.5812	2.28197	33.6438	29.4812	15.4423	8.94569	20.4341	36.783	4.52794
df	2	2	2	2	2	2	2	2	2	2	2	2	2	2	2	2	2	2	2	2	2	2	2	2
Asymp. Sig.	0.868618	0.40963	0.000512858	0.00352322	0.0598448	0.0134566	2.41553e-08	0.787854	0.0171455	0.000146154	0.0315711	8.64098e-05	0.000512595	0.57994	0.0105609	2.54134e-09	0.319504	4.94688e-08	3.96487e-07	0.000443358	0.0114148	3.65414e-05	1.02959e-08	0.103937
a. Kruskal Wallis Test
b. Grouping Variable: Malaria status

## Sheet: CT-NCM No Children
NPAR TESTS /M-W= EGF Eotaxin GCSF GMCSF IFNa2 IFNg IL10 IL12p40 IL12p70 IL15 IL17A IL1RA IL1a IL1b IL5 IL6 IL7 IL8 IP10 MCP1 MIP1a MIP1b TNFa VEGF BY Status(1 2) /MISSING ANALYSIS.
NPar Tests
Notes
Output Created		09-Mar-2016 20:18:12
Comments
Input	Data	C:\Users\user\Desktop\YD FROM NOV-28\Hp and malaria\Malaria manuscripts\Writing cytokine paper\PeerJ submission\Revision PeerJ\Stats for revision\SPSS Cytokine Palu-March 2016.sav
	Active Dataset	DataSet1
	Filter	Age > 14 (FILTER)
	Weight	<none>
	Split File	<none>
	N of Rows in Working Data File	56
Missing Value Handling	Definition of Missing	User-defined missing values are treated as missing.
	Cases Used	Statistics for each test are based on all cases with valid data for the variable(s) used in that test.
Syntax		NPAR TESTS /M-W= EGF Eotaxin GCSF GMCSF IFNa2 IFNg IL10 IL12p40 IL12p70 IL15 IL17A IL1RA IL1a IL1b IL5 IL6 IL7 IL8 IP10 MCP1 MIP1a MIP1b TNFa VEGF BY Status(1 2) /MISSING ANALYSIS.
Resources	Processor Time	0:00:00.031
	Elapsed Time	0:00:00.125
	Number of Cases Alloweda	26214
a. Based on availability of workspace memory.
[DataSet1] C:\Users\user\Desktop\YD FROM NOV-28\Hp and malaria\Malaria manuscripts\Writing cytokine paper\PeerJ submission\Revision PeerJ\Stats for revision\SPSS Cytokine Palu-March 2016.sav
Mann-Whitney Test
							Benjamini-Hochberg adjustment (biomarkers that significantly differ are shown in bold)
Ranks							P	i	q	m	crit	test
	Malaria status	N	Mean Rank	Sum of Ranks			0.877	24	0.05	24	0.05	0
EGF	Control	18	14.6667	264			0.808	23	0.05	24	0.047917	0
	Non-Cerebral Malaria	11	15.5455	171			0.774	22	0.05	24	0.045833	0
	Total	29					0.674	21	0.05	24	0.04375	0
Eotaxin	Control	18	16.1944	291.5			0.387	20	0.05	24	0.041667	0
	Non-Cerebral Malaria	11	13.0455	143.5			0.34	19	0.05	24	0.039583	0
	Total	29					0.296	18	0.05	24	0.0375	0
G-CSF	Control	18	13.6667	246			0.296	17	0.05	24	0.035417	0
	Non-Cerebral Malaria	11	17.1818	189			0.276	16	0.05	24	0.033333	0
	Total	29					0.188	15	0.05	24	0.03125	0
GM-CSF	Control	18	12.8056	230.5			0.159	14	0.05	24	0.029167	0
	Non-Cerebral Malaria	11	18.5909	204.5			0.159	13	0.05	24	0.027083	0
	Total	29					0.102	12	0.05	24	0.025	0
IFN-alpha2	Control	18	12.4722	224.5			0.076	11	0.05	24	0.022917	0
	Non-Cerebral Malaria	11	19.1364	210.5		IFNa2	0.039	10	0.05	24	0.020833	0
	Total	29				IFNg	0.011	9	0.05	24	0.01875	1
IFN-gamma	Control	18	11.9167	214.5		IL-8	0.007	8	0.05	24	0.016667	1
	Non-Cerebral Malaria	11	20.0455	220.5		IL-12p70	0.005	7	0.05	24	0.014583	1
	Total	29				IL-1a	0.002	6	0.05	24	0.0125	1
IL-10	Control	18	9.61111	173		IL-10	0	5	0.05	24	0.010417	1
	Non-Cerebral Malaria	11	23.8182	262		TNFa	0	4	0.05	24	0.008333	1
	Total	29				IP-10	0	3	0.05	24	0.00625	1
IL-12p40	Control	18	14.7778	266		IL-6	0	2	0.05	24	0.004167	1
	Non-Cerebral Malaria	11	15.3636	169		MIP-1b	0	1	0.05	24	0.002083	1
	Total	29
IL-12p70	Control	18	11.6389	209.5
	Non-Cerebral Malaria	11	20.5	225.5
	Total	29
IL-15	Control	18	13.25	238.5
	Non-Cerebral Malaria	11	17.8636	196.5
	Total	29
IL-17A	Control	18	13.3333	240
	Non-Cerebral Malaria	11	17.7273	195
	Total	29
IL-1RA	Control	18	12.9444	233
	Non-Cerebral Malaria	11	18.3636	202
	Total	29
IL-1alpha	Control	18	11.3333	204
	Non-Cerebral Malaria	11	21	231
	Total	29
IL-1beta	Control	18	14.6389	263.5
	Non-Cerebral Malaria	11	15.5909	171.5
	Total	29
IL-5	Control	18	13.6111	245
	Non-Cerebral Malaria	11	17.2727	190
	Total	29
IL-6	Control	18	10.1667	183
	Non-Cerebral Malaria	11	22.9091	252
	Total	29
IL-7	Control	18	14.4722	260.5
	Non-Cerebral Malaria	11	15.8636	174.5
	Total	29
IL-8	Control	18	11.7222	211
	Non-Cerebral Malaria	11	20.3636	224
	Total	29
IP-10	Control	18	9.94444	179
	Non-Cerebral Malaria	11	23.2727	256
	Total	29
MCP-1	Control	18	13.6667	246
	Non-Cerebral Malaria	11	17.1818	189
	Total	29
MIP-1alpha	Control	18	13.2222	238
	Non-Cerebral Malaria	11	17.9091	197
	Total	29
MIP-1beta	Control	18	10.9167	196.5
	Non-Cerebral Malaria	11	21.6818	238.5
	Total	29
TNFalpha	Control	18	9.66667	174
	Non-Cerebral Malaria	11	23.7273	261
	Total	29
VEGF	Control	18	13.9167	250.5
	Non-Cerebral Malaria	11	16.7727	184.5
	Total	29
Test Statisticsb
	EGF	Eotaxin	G-CSF	GM-CSF	IFN-alpha2	IFN-gamma	IL-10	IL-12p40	IL-12p70	IL-15	IL-17A	IL-1RA	IL-1alpha	IL-1beta	IL-5	IL-6	IL-7	IL-8	IP-10	MCP-1	MIP-1alpha	MIP-1beta	TNFalpha	VEGF
Mann-Whitney U	93	77.5	75	59.5	53.5	43.5	2	95	38.5	67.5	69	62	33	92.5	74	12	89.5	40	8	75	67	25.5	3	79.5
Wilcoxon W	264	143.5	246	230.5	224.5	214.5	173	266	209.5	238.5	240	233	204	263.5	245	183	260.5	211	179	246	238	196.5	174	250.5
Z	-0.270079	-0.966472	-1.07912	-1.77758	-2.05216	-2.51067	-4.87744	-0.409131	-2.74268	-2.15038	-1.36394	-1.669	-3.40036	-0.334938	-1.37031	-4.37461	-0.489525	-2.65251	-4.09015	-1.07872	-1.57635	-3.3048	-4.31594	-0.881577
Asymp. Sig. (2-tailed)	0.787099	0.333808	0.280535	0.0754723	0.040154	0.0120502	1.07473e-06	0.682444	0.00609403	0.0315254	0.172586	0.0951178	0.000672968	0.737672	0.17059	1.2165e-05	0.62447	0.00798967	4.31102e-05	0.280713	0.114946	0.00095044	1.58923e-05	0.378005
Exact Sig. [2*(1-tailed Sig.)]	.808a	.340a	.296a	.076a	.039a	.011a	.000a	.877a	.005a	.159a	.188a	.102a	.002a	.774a	.276a	.000a	.674a	.007a	.000a	.296a	.159a	.000a	.000a	.387a
a. Not corrected for ties.
b. Grouping Variable: Malaria status

## Sheet: CT-CM No Children
NPAR TESTS /M-W= EGF Eotaxin GCSF GMCSF IFNa2 IFNg IL10 IL12p40 IL12p70 IL15 IL17A IL1RA IL1a IL1b IL5 IL6 IL7 IL8 IP10 MCP1 MIP1a MIP1b TNFa VEGF BY Status(1 3) /MISSING ANALYSIS.
NPar Tests
Notes
Output Created		09-Mar-2016 20:57:37
Comments
Input	Data	C:\Users\user\Desktop\YD FROM NOV-28\Hp and malaria\Malaria manuscripts\Writing cytokine paper\PeerJ submission\Revision PeerJ\Stats for revision\SPSS Cytokine Palu-March 2016.sav
	Active Dataset	DataSet1
	Filter	Age > 14 (FILTER)
	Weight	<none>
	Split File	<none>
	N of Rows in Working Data File	56
Missing Value Handling	Definition of Missing	User-defined missing values are treated as missing.
	Cases Used	Statistics for each test are based on all cases with valid data for the variable(s) used in that test.
Syntax		NPAR TESTS /M-W= EGF Eotaxin GCSF GMCSF IFNa2 IFNg IL10 IL12p40 IL12p70 IL15 IL17A IL1RA IL1a IL1b IL5 IL6 IL7 IL8 IP10 MCP1 MIP1a MIP1b TNFa VEGF BY Status(1 3) /MISSING ANALYSIS.
Resources	Processor Time	0:00:00.031
	Elapsed Time	0:00:00.031
	Number of Cases Alloweda	26214
a. Based on availability of workspace memory.
[DataSet1] C:\Users\user\Desktop\YD FROM NOV-28\Hp and malaria\Malaria manuscripts\Writing cytokine paper\PeerJ submission\Revision PeerJ\Stats for revision\SPSS Cytokine Palu-March 2016.sav
Mann-Whitney Test
							Benjamini-Hochberg adjustment (biomarkers that significantly differ are shown in bold)
Ranks							P	i	q	m	crit	test
	Malaria status	N	Mean Rank	Sum of Ranks			0.871	24	0.05	24	0.05	0
EGF	Control	18	23.7778	428			0.745	23	0.05	24	0.047917	0
	Cerebral Malaria	27	22.4815	607			0.496	22	0.05	24	0.045833	0
	Total	45					0.302	21	0.05	24	0.04375	0
Eotaxin	Control	18	22.6111	407			0.16	20	0.05	24	0.041667	0
	Cerebral Malaria	27	23.2593	628			0.068	19	0.05	24	0.039583	0
	Total	45					0.066	18	0.05	24	0.0375	0
G-CSF	Control	18	14.25	256.5		VEGF	0.039	17	0.05	24	0.035417	0
	Cerebral Malaria	27	28.8333	778.5		IFNa2	0.038	16	0.05	24	0.033333	0
	Total	45				IFNg	0.01	15	0.05	24	0.03125	1
GM-CSF	Control	18	15.6667	282		IL-17A	0.009	14	0.05	24	0.029167	1
	Cerebral Malaria	27	27.8889	753		MIP-1a	0.004	13	0.05	24	0.027083	1
	Total	45				GM-CSF	0.002	12	0.05	24	0.025	1
IFN-alpha2	Control	18	18.0278	324.5		IL-6	0	11	0.05	24	0.022917	1
	Cerebral Malaria	27	26.3148	710.5		TNFa	0	10	0.05	24	0.020833	1
	Total	45				IL-8	0	9	0.05	24	0.01875	1
IFN-gamma	Control	18	16.8611	303.5		IL-10	0	8	0.05	24	0.016667	1
	Cerebral Malaria	27	27.0926	731.5		IP-10	0	7	0.05	24	0.014583	1
	Total	45				MIP-1b	0	6	0.05	24	0.0125	1
IL-10	Control	18	10.5556	190		IL-1RA	0	5	0.05	24	0.010417	1
	Cerebral Malaria	27	31.2963	845		MCP-1	0	4	0.05	24	0.008333	1
	Total	45				G-CSF	0	3	0.05	24	0.00625	1
IL-12p40	Control	18	22.1944	399.5		IL-15	0	2	0.05	24	0.004167	1
	Cerebral Malaria	27	23.537	635.5		IL-1a	0	1	0.05	24	0.002083	1
	Total	45
IL-12p70	Control	18	18.6389	335.5
	Cerebral Malaria	27	25.9074	699.5
	Total	45
IL-15	Control	18	14.3611	258.5
	Cerebral Malaria	27	28.7593	776.5
	Total	45
IL-17A	Control	18	16.8056	302.5
	Cerebral Malaria	27	27.1296	732.5
	Total	45
IL-1RA	Control	18	13.6111	245
	Cerebral Malaria	27	29.2593	790
	Total	45
IL-1alpha	Control	18	15.0556	271
	Cerebral Malaria	27	28.2963	764
	Total	45
IL-1beta	Control	18	20.75	373.5
	Cerebral Malaria	27	24.5	661.5
	Total	45
IL-5	Control	18	25.3889	457
	Cerebral Malaria	27	21.4074	578
	Total	45
IL-6	Control	18	9.5	171
	Cerebral Malaria	27	32	864
	Total	45
IL-7	Control	18	19.8333	357
	Cerebral Malaria	27	25.1111	678
	Total	45
IL-8	Control	18	10.2778	185
	Cerebral Malaria	27	31.4815	850
	Total	45
IP-10	Control	18	11.0556	199
	Cerebral Malaria	27	30.963	836
	Total	45
MCP-1	Control	18	13.9444	251
	Cerebral Malaria	27	29.037	784
	Total	45
MIP-1alpha	Control	18	16.25	292.5
	Cerebral Malaria	27	27.5	742.5
	Total	45
MIP-1beta	Control	18	12.7778	230
	Cerebral Malaria	27	29.8148	805
	Total	45
TNFalpha	Control	18	9.69444	174.5
	Cerebral Malaria	27	31.8704	860.5
	Total	45
VEGF	Control	18	18.0556	325
	Cerebral Malaria	27	26.2963	710
	Total	45
Test Statisticsa
	EGF	Eotaxin	G-CSF	GM-CSF	IFN-alpha2	IFN-gamma	IL-10	IL-12p40	IL-12p70	IL-15	IL-17A	IL-1RA	IL-1alpha	IL-1beta	IL-5	IL-6	IL-7	IL-8	IP-10	MCP-1	MIP-1alpha	MIP-1beta	TNFalpha	VEGF
Mann-Whitney U	229	236	85.5	111	153.5	132.5	19	228.5	164.5	87.5	131.5	74	100	202.5	200	0	186	14	28	80	121.5	59	3.5	154
Wilcoxon W	607	407	256.5	282	324.5	303.5	190	399.5	335.5	258.5	302.5	245	271	373.5	578	171	357	185	199	251	292.5	230	174.5	325
Z	-0.324709	-0.162178	-3.64936	-3.05972	-2.07918	-2.57558	-5.39627	-0.680543	-1.84029	-4.00978	-2.59854	-3.91879	-3.59673	-1.0311	-1.8257	-5.76039	-1.40604	-5.30588	-4.98118	-3.77643	-2.90944	-4.26423	-5.54935	-2.06654
Asymp. Sig. (2-tailed)	0.745401	0.871166	0.000262892	0.00221541	0.0376005	0.0100072	6.80393e-08	0.496161	0.0657251	6.07745e-05	0.00936206	8.89928e-05	0.000322245	0.302495	0.0678959	8.39208e-09	0.159712	1.12129e-07	6.31985e-07	0.000159094	0.00362082	2.00597e-05	2.86736e-08	0.0387774
a. Grouping Variable: Malaria status
