# Supplementary material for: Cytokine response during non-cerebral and cerebral malaria: evidence of a failure to control inflammation as a cause of death in African adults
Source: PeerJ. 2016 May 2;4:e1965. doi: 10.7717/peerj.1965 (PMC4860323; doi:10.7717/peerj.1965)
Supplement: Supplemental Information 4 [file peerj-04-1965-s005.xlsx]

## Sheet: IL10 ratios
Mann-Whitney Test on ratio of biomarkers in NCM/CM
Ranks
	Outcome	N	Mean Rank	Sum of Ranks
IL-10/TNFa	Survived	18	13.5556	244
	Deceased	9	14.8889	134
	Total	27
IL-10/IP-10	Survived	18	12.2222	220
	Deceased	9	17.5556	158
	Total	27
IL-10/IL-8	Survived	18	14.2778	257
	Deceased	9	13.4444	121
	Total	27
IL-10/MCP-1	Survived	18	13.9444	251
	Deceased	9	14.1111	127
	Total	27
IL-10/MIP-1b	Survived	18	11.8333	213
	Deceased	9	18.3333	165
	Total	27
IFNa2/IL10	Survived	16	12.5	200
	Deceased	9	13.8889	125
	Total	25
IFNg/IL10	Survived	16	14.8125	237
	Deceased	9	9.77778	88
	Total	25
IL-12p70/IL-10	Survived	16	12.8125	205
	Deceased	9	13.3333	120
	Total	25
IL-15/IL-10	Survived	16	10.875	174
	Deceased	9	16.7778	151
	Total	25
IL-17A/IL-10	Survived	16	13.3125	213
	Deceased	9	12.4444	112
	Total	25
IL-1a/IL-10	Survived	16	12.7812	204.5
	Deceased	9	13.3889	120.5
	Total	25
MIP-1a/IL-10	Survived	16	13.75	220
	Deceased	9	11.6667	105
	Total	25
Test Statisticsb
	IL-10/TNFa	IL-10/IP-10	IL-10/IL-8	IL-10/MCP-1	IL-10/MIP-1b	IFNa2/IL10	IFNg/IL10	IL-12p70/IL-10	IL-15/IL-10	IL-17A/IL-10	IL-1a/IL-10	MIP-1a/IL-10
Mann-Whitney U	73	49	76	80	42	64	43	69	38	67	68.5	60
Wilcoxon W	244	220	121	251	213	200	88	205	174	112	204.5	105
Z	-0.411538	-1.64615	-0.257212	-0.0514423	-2.00625	-0.453784	-1.64307	-0.170169	-1.95674	-0.283287	-0.199496	-0.683986
Asymp. Sig. (2-tailed)	0.680678	0.0997321	0.797015	0.958973	0.0448296	0.649984	0.100369	0.864877	0.0503781	0.776957	0.841875	0.493984
Exact Sig. [2*(1-tailed Sig.)]	.705a	.106a	.820a	.980a	.046a	.677a	.108a	.890a	.057a	.803a	.846a	.522a
a. Not corrected for ties.
b. Grouping Variable: Outcome

## Sheet: IL-5 ratios
Mann-Whitney Test on ratio of biomarkers in NCM/CM
Ranks
	Malaria status	N	Mean Rank	Sum of Ranks
IL-5/TNFa	Non-Cerebral Malaria	17	27.4706	467
	Cerebral Malaria	27	19.3704	523
	Total	44
IL-5/IL-17A	Non-Cerebral Malaria	13	22.5385	293
	Cerebral Malaria	23	16.2174	373
	Total	36
IL-5/IP-10	Non-Cerebral Malaria	17	27.4706	467
	Cerebral Malaria	27	19.3704	523
	Total	44
IL-5/IL-1a	Non-Cerebral Malaria	13	19.5385	254
	Cerebral Malaria	19	14.4211	274
	Total	32
IL-5/IL-8	Non-Cerebral Malaria	15	26.2667	394
	Cerebral Malaria	27	18.8519	509
	Total	42
IL-5/IFNg	Non-Cerebral Malaria	16	23.875	382
	Cerebral Malaria	23	17.3043	398
	Total	39
Test Statisticsb
	IL-5/TNFa	IL-5/IL-17A	IL-5/IP-10	IL-5/IL-1a	IL-5/IL-8	IL-5/IFNg
Mann-Whitney U	145	97	145	84	131	122
Wilcoxon W	523	373	523	274	509	398
Z	-3.02802	-2.66329	-3.02802	-2.22522	-2.89112	-2.64545
Asymp. Sig. (2-tailed)	0.00246164	0.00773809	0.00246164	0.0260663	0.00383867	0.00815827
Exact Sig. [2*(1-tailed Sig.)]		.087a		.136a		.079a
a. Not corrected for ties.
b. Grouping Variable: Malaria status
